# Supplementary material for: Catalysis for the hydrogenation of nitroaromatics by highly dispersed palladium nanoparticles anchored on a resorcin[4]arene-based metal–organic dimer containing amino groups
Source: Royal Society of Chemistry journal article supplement (doi:10.1039/d4qi01342e), 2024-01-01
Supplement: d4qi01342e1.pdf [file d4qi01342e1.pdf]

## **Supporting Information**

### **Precisely tuning resorcin[4]arene-based metal-organic dimers with highly dispersed palladium nanoparticles for nitroaromatic hydrogenation in water**

Fei-Fei Wang,<sup>a,b</sup> Wei Jiang,<sup>c</sup> Wen-Yuan Pei<sup>a\*</sup> and Jian-Fang Ma<sup>a\*</sup>

<sup>a</sup> *Key Laboratory of Polyoxometalate and Reticular Material Chemistry of Ministry of Education, Department of Chemistry, Northeast Normal University, Changchun 130024, China*

<sup>b</sup> *Department of Chemistry, Xinzhou Normal University, Xinzhou 034000, China*

<sup>c</sup> *Key Laboratory of Preparation and Application of Environmental Friendly Materials, Ministry of Education, Jilin Normal University, Changchun 130103, China*

\* Correspondence authors

E-mail: peiwy527@nenu.edu.cn (W.-Y. Pei)

E-mail: majf247@nenu.edu.cn (J.-F. Ma)

## Experimental section

**Material and methods.** Zinc nitrate hexahydrate ( $\text{Zn}(\text{NO}_3)_2 \cdot 6\text{H}_2\text{O}$ ), 1,4-benzenedicarboxylic acid, 2-aminoterephthalic acid, 2-nitroterephthalic acid, 2,6-naphthalenedicarboxylic acid, 4,4'-biphenyldicarboxylic acid, 4,4'-stilbenedicarboxylic acid, azobenzene-4,4'-dicarboxylic acid, Palladium chloride ( $\text{PdCl}_2$ ), 50% Hydrazine hydrate, Ammonia borane ( $\text{NH}_3\text{BH}_3$ ), Chlorobenzene and a series of nitroaromatic compounds were purchased from Aladdin Industrial Co., Ltd. 2,2'-bipyridine-5,5'-dicarboxylic acid and *p*-terphenyl-4,4''-dicarboxylic acid were offered by Jinan Henghua Sci. & Tec. Co. Ltd. , Ltd. *N,N'*-dimethylformamide (DMF) was obtained from Tianjin Fuyu Chemical Reagents Company. Methanol was HPLC grade. Tetra(imidazole)resorcin[4]arene (TIC4R) was prepared according to the literature method.<sup>1</sup> PXRD patterns were performed on a Rigaku Dmax 2000 X-ray diffractometer and Rigaku SmartLab X-ray diffractometer with graphite monochromatized  $\text{CuK}\alpha$  radiation ( $\lambda = 0.154 \text{ nm}$ ). Perkin-Elmer Model TG-7 analyzer was used to measure thermogravimetric curves. FT-IR spectrum was determined on a Nicolet 6700 FT-IR spectrometer with a KBr plate. Field emission scanning electron microscope (FESEM, Philips XL-30) was employed to record the morphologies of the materials. Elemental analytical data of C, H and N were recorded on a PerkinElmer 2400 CHN elemental analyzer. Leeman Laboratories Prodigy inductively coupled plasma–optical atomic emission spectrometer (ICP–AES) was used to record the content of Pd. Conversion and selectivity were determined with high performance liquid chromatography (HPLC) with an Inertsil ( $5 \mu\text{m}$ ,  $4.6 \times 150 \text{ mm}$ ) ODS C18 column using a UV–vis detector at  $\lambda = 254 \text{ nm}$  (Agilent-1220). <sup>1</sup>H NMR spectrum was recorded on a Varian 500 MHz. ESCA LAB spectrometer (USA) with a monochromatic Al  $\text{K}\alpha$  source ( $h\nu 1486.6\text{eV}$ ) was applied to determine X-ray photoelectron spectroscopy (XPS). High-resolution transmission electron microscopy (HRTEM) image was achieved on a JEOL 2100F with an accelerating voltage of 200 kV.

**X-ray crystallography.** Crystallographic data of **1-9** were collected on an Oxford Diffraction Gemini R Ultra diffractometer with graphite-monochromated  $\text{MoK}\alpha$  radiation ( $\lambda = 0.71073 \text{ \AA}$ ). Structures of **1-9** were solved by direct methods with SHELXS-2018/3 and refined on  $F^2$  by full-matrix least-squares with SHELXTL-2018/3 within WINGX.<sup>2-4</sup> Multi-scan method was applied for absorption corrections. Non-hydrogen atoms were refined anisotropically. SQUEEZE function in PLATON was employed to refine the structures of **4**, **5** and **9**, and their formulas were obtained on the basis of the diffused electron

density, thermogravimetric analysis and elemental analysis.<sup>5</sup> Crystallographic data were listed in Table S2. Selected bond lengths and angles were given in Tables S3-S11.

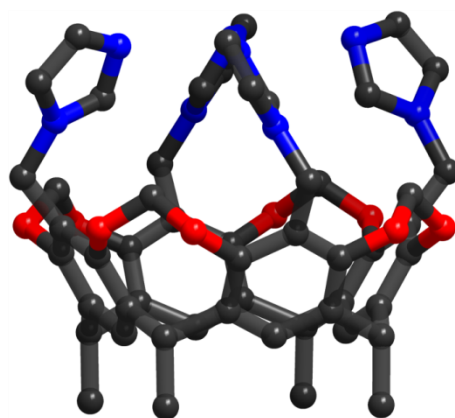

**Scheme S1.** Structure of ligand TIC4R.

**Synthesis of  $[\text{Zn}_4(\text{TIC4R})_2 \cdot (\text{L}^1)_2 \cdot (\text{OH})_2] \cdot 2\text{HCOO} \cdot 4\text{DMF}$  (**1**).** A mixture of TIC4R (9 mg, 0.010 mmol),  $\text{Zn}(\text{NO}_3)_2 \cdot 6\text{H}_2\text{O}$  (14 mg, 0.047 mmol) and  $\text{H}_2\text{L}^1$  (7 mg, 0.042 mmol) was added to a solution of DMF/ $\text{H}_2\text{O}$  (8 mL, 6/2, v/v) in a Teflon reactor (15 mL). Then, the reaction mixture was heated at 110 °C for 3 days. After cooling to room temperature, colorless diamond-shaped crystals of **1** were achieved in a 66% yield based on TIC4R. Element analysis (%) calculated for  $\text{C}_{134}\text{H}_{136}\text{N}_{20}\text{O}_{34}\text{Zn}_4$ : C 56.83, H 4.84, N 9.89; found: C 57.11, H 4.72, N 10.09. IR data (KBr,  $\text{cm}^{-1}$ ): 3400 (w), 3130 (w), 2940 (m), 2758 (w), 2670 (w), 1674 (s), 1598 (s), 1532 (m), 1476 (s), 1435 (m), 1364 (s), 1335 (m), 1364 (s), 1230 (m), 1253 (s), 1218 (m), 1147 (w), 1119 (s), 1093 (s), 1059 (m), 1007 (m), 982 (s), 948 (s), 919 (m), 825 (m), 797 (w), 755 (s), 696 (w), 658 (m), 644 (w), 626 (w), 579 (m), 520 (w), 504 (w).

**Synthesis of  $[\text{Zn}_4(\text{TIC4R})_2 \cdot (\text{L}^2)_2 \cdot (\text{OH})_2] \cdot 2\text{HCOO} \cdot 4\text{DMF}$  (**2**).** **2** was prepared by the similar experimental procedure to that of **1** except that  $\text{H}_2\text{L}^1$  was replaced by  $\text{H}_2\text{L}^2$  (7 mg, 0.039 mmol). Yellow diamond-shaped crystals of **2** were achieved in a 68% yield based on TIC4R. Element analysis (%) calculated for  $\text{C}_{134}\text{H}_{138}\text{N}_{22}\text{O}_{34}\text{Zn}_4$ : C 56.13, H 4.86, N 10.77; found: C 55.83, H 4.25, N 11.17. IR data (KBr,  $\text{cm}^{-1}$ ): 3440 (m), 3323 (m), 3132 (m), 2970 (m), 2941 (m), 2880 (w), 2759 (w), 2671 (w), 1675 (s), 1604 (s), 1581 (s), 1532 (m), 1476 (s), 1434 (s), 1404 (m), 1382 (s), 1253 (s), 1218 (w), 1147 (m), 1116 (s), 1094 (s), 1060 (m), 1007 (s), 983 (s), 949 (s), 920 (s), 829 (w), 799 (w), 777 (m), 755 (m), 696 (w), 678 (w), 659 (m), 644 (w), 626 (w), 579 (m), 505 (w), 443 (w).

**Synthesis of  $[\text{Zn}_4(\text{TIC4R})_2 \cdot (\text{L}^3)_2 \cdot (\text{OH})_2] \cdot 2\text{HCOO} \cdot 3\text{H}_2\text{O}$  (**3**).** **3** was prepared by the similar

experimental procedure to that of **1** except that  $\text{H}_2\text{L}^1$  was replaced by  $\text{H}_2\text{L}^3$  (8 mg, 0.038 mmol) and the ratio of DMF/ $\text{H}_2\text{O}$  was changed to 7/1. Colorless diamond-shaped crystals of **3** were achieved in a 62% yield based on TIC4R. Element analysis (%) calculated for  $\text{C}_{134}\text{H}_{134}\text{N}_{22}\text{O}_{38}\text{Zn}_4$ : C 55.08, H 4.62, N 10.55; found: C 55.86, H 4.71, N 10.03. IR data (KBr,  $\text{cm}^{-1}$ ): 3082 (w), 2936 (w), 2759 (w), 1670 (s), 1618 (m), 1557 (s), 1532 (m), 1473 (m), 1436 (w), 1357 (s), 1335 (m), 1299 (w), 1247 (s), 1148 (w), 1114 (m), 1091 (s), 1057 (m), 1005 (m), 977 (s), 943 (s), 917 (s), 822(m), 798 (w), 781 (w), 748 (s), 695 (m), 658 (m), 623 (w), 579 (s), 502 (s), 442 (w).

**Synthesis of  $[\text{Zn}_4(\text{TIC4R})_2 \cdot (\text{L}^4)_2 \cdot (\text{OH})_2] \cdot 2\text{HCOO} \cdot 3\text{H}_2\text{O}$  (**4**).** **4** was prepared by the similar experimental procedure to that of **3** except that  $\text{H}_2\text{L}^1$  was replaced by  $\text{H}_2\text{L}^3$  (10 mg, 0.046 mmol). Colorless diamond-shaped crystals of **4** were achieved in a 65% yield based on TIC4R. Element analysis (%) calculated for  $\text{C}_{130}\text{H}_{118}\text{N}_{16}\text{O}_{33}\text{Zn}_4$ : C 57.96, H 4.41, N 8.32; found: C 57.09, H 4.78, N 8.83. IR data (KBr,  $\text{cm}^{-1}$ ): 3421 (w), 3126 (w), 2941 (w), 2759 (w), 1673 (s), 1614 (s), 1584 (s), 1520 (m), 1475 (s), 1436 (m), 1403 (s), 1385 (s), 1355 (s), 1254 (m), 1148 (w), 1113 (m), 1093 (s), 1060 (m), 1007 (m), 983 (s), 950 (s), 922 (m), 794 (m), 754 (w), 699 (w), 659 (m), 643 (w), 579 (m), 504 (w), 468 (w).

**Synthesis of  $[\text{Zn}_4(\text{TIC4R})_2 \cdot (\text{L}^5)_2 \cdot (\text{OH})_2] \cdot 2\text{HCOO} \cdot \text{H}_2\text{O}$  (**5**).** **5** was prepared by the similar experimental procedure to that of **1** except that  $\text{H}_2\text{L}^1$  was replaced by  $\text{H}_2\text{L}^4$  (10 mg, 0.041 mmol) and the ratio of DMF/ $\text{H}_2\text{O}$  was changed to 5/3. Colorless diamond-shaped crystals of **5** were achieved in a 60% yield based on TIC4R. Element analysis (%) calculated for  $\text{C}_{134}\text{H}_{118}\text{N}_{16}\text{O}_{31}\text{Zn}_4$ : C 59.39, H 4.39, N 8.27; found: C 58.97, H 4.89, N 8.64. IR data (KBr,  $\text{cm}^{-1}$ ): 3422 (m), 3124 (m), 2941 (m), 2758 (w), 1674 (s), 1609 (s), 1584 (s), 1534 (m), 1475 (s), 1436 (m), 1378 (s), 1255 (s), 1178 (w), 1148 (w), 1117 (s), 1093 (s), 1059 (m), 1006 (m), 982 (s), 948 (s), 919 (m), 860 (w), 839 (w), 799 (w), 773 (s), 742 (m), 685 (w), 659 (m), 644(w), 578 (m), 505 (w), 454 (w).

**Synthesis of  $[\text{Zn}_4(\text{TIC4R})_2 \cdot (\text{L}^6)_2 \cdot (\text{OH})_2] \cdot 2\text{HCOO}$  (**6**).** **6** was prepared by the similar experimental procedure to that of **3** except that  $\text{H}_2\text{L}^3$  was replaced by  $\text{H}_2\text{L}^5$  (10 mg, 0.041 mmol). Colorless diamond-shaped crystals of **6** were achieved in a 42% yield based on TIC4R. Element analysis (%) calculated for  $\text{C}_{130}\text{H}_{112}\text{N}_{20}\text{O}_{30}\text{Zn}_4$ : C 57.91, H 4.19, N 10.39; found: C 57.13, H 4.01, N 10.94. IR data (KBr,  $\text{cm}^{-1}$ ): 3432 (w), 3125 (m), 2941 (m), 2765 (w), 1672 (s), 1617 (s), 1593 (s), 1581 (s), 1536 (m), 1475 (s), 1435 (m), 1358 (s), 1301 (m), 1253 (s), 1151 (w), 1116 (s), 1094 (s), 1061 (m), 1009 (m), 984 (s), 950 (s), 923 (m), 843 (w), 781 (m), 755 (w), 708 (w), 696 (w), 658 (m), 643 (w), 626(w), 579 (m), 505

(w), 472(w).

**Synthesis of  $[\text{Zn}_4(\text{TIC4R})_2 \cdot (\text{L}^7)_2 \cdot (\text{OH})_2] \cdot 2\text{HCOO} \cdot 6\text{DMF}$  (7).** 7 was prepared by the similar experimental procedure to that of 3 except that  $\text{H}_2\text{L}^3$  was replaced by  $\text{H}_2\text{L}^6$  (11 mg, 0.041 mmol). Colorless diamond-shaped crystals of 7 were achieved in a 63% yield based on TIC4R. Element analysis (%) calculated for  $\text{C}_{156}\text{H}_{142}\text{N}_{22}\text{O}_{36}\text{Zn}_4$ : C 59.25, H 4.53, N 9.74; found: C 60.01, H 4.12, N 9.96. IR data (KBr,  $\text{cm}^{-1}$ ): 3426 (w), 2941 (m), 2758 (w), 2669 (w), 1674 (s), 1609 (s), 1583 (s), 1559 (m), 1534 (m), 1475 (s), 1436 (m), 1406 (s), 1372 (s), 1301 (m), 1255 (s), 1178 (w), 1148 (w), 1116 (s), 1093 (s), 1059 (m), 1006 (m), 982 (s), 949 (s), 919 (m), 854 (w), 802 (w), 788 (m), 744 (m), 708 (w), 696 (w), 659 (m), 644 (m), 578 (m), 529 (w), 504 (w), 426(w).

**Synthesis of  $[\text{Zn}_4(\text{TIC4R})_2 \cdot (\text{L}^8)_2 \cdot (\text{OH})_2] \cdot 2\text{HCOO} \cdot 6\text{DMF}$  (8).** 8 was prepared by the similar experimental procedure to that of 3 except that  $\text{H}_2\text{L}^3$  was replaced by  $\text{H}_2\text{L}^7$  (11 mg, 0.041 mmol). Orange diamond-shaped crystals of 8 were achieved in a 58% yield based on TIC4R. Element analysis (%) calculated for  $\text{C}_{152}\text{H}_{158}\text{N}_{26}\text{O}_{36}\text{Zn}_4$ : C 57.28, H 5.00, N 11.42; found: C 56.93, H 5.08, N 11.26. IR data (KBr,  $\text{cm}^{-1}$ ): 3413 (w), 3128 (w), 2940 (m), 2757 (w), 2668 (w), 1675 (s), 1615 (s), 1583 (s), 1534 (m), 1476 (s), 1436 (m), 1405 (s), 1370 (s), 1304 (m), 1254 (s), 1216 (m), 1148 (w), 1117 (s), 1092 (s), 1059 (m), 1007 (s), 983 (s), 949 (s), 918 (m), 881 (w), 857 (w), 795 (m), 743 (m), 707 (w), 696 (w), 659 (m), 643 (m), 578 (m), 504 (w), 425(w).

**Synthesis of  $[\text{Zn}_4(\text{TIC4R})_2 \cdot (\text{L}^9)_2 \cdot (\text{OH})_2] \cdot 2\text{HCOO} \cdot 5\text{DMF} \cdot 4\text{H}_2\text{O}$  (9).** 9 was prepared by the similar experimental procedure to that of 1 except that  $\text{H}_2\text{L}^1$  was replaced by  $\text{H}_2\text{L}^8$  (10 mg, 0.038 mmol) and the reaction temperature was changed to 130 °C. Colorless diamond-shaped crystals of 9 were achieved in a 48% yield based on TIC4R. Element analysis (%) calculated for  $\text{C}_{161}\text{H}_{167}\text{N}_{21}\text{O}_{39}\text{Zn}_4$ : C 58.92, H 5.13, N 8.96; found: C 59.05, H 5.75, N 9.88. IR data (KBr,  $\text{cm}^{-1}$ ): 3421 (w), 3127 (w), 2941 (m), 2758 (w), 1674 (s), 1612 (s), 1585 (s), 1558 (m), 1531 (m), 1476 (s), 1436 (m), 1380 (s), 1302 (m), 1248 (s), 1182 (w), 1149 (w), 1115 (m), 1093 (s), 1060 (m), 1007 (s), 983 (s), 949 (s), 920 (m), 838 (m), 780 (s), 748 (w), 696 (w), 658 (m), 643 (w), 625 (w), 578 (m), 504 (w).

**Syntheses of Pd@1 and Pd@2.** Samples of Pd@1 and Pd@2 were synthesized according to the previously reported procedure with a slight modification.<sup>6</sup> HCl (12 mol/L, two drops) and PdCl<sub>2</sub> (16.7 mg) were added to water (5 mL), and then the mixture was standed for 2 h until the solid was dissolved. The solution was diluted to produce the H<sub>2</sub>PdCl<sub>4</sub> solution ( $1 \times 10^{-3}$  M, 100 mL). The activated sample of 1 (150 mg) was dispersed in deionized water (150 mL) and stirred for 0.5 h. The H<sub>2</sub>PdCl<sub>4</sub> solution

was added to the resulting suspension with stirring. The mixture was then stirred for 15 h, and the slurry of  $[1]^+ \cdot 1/2[\text{PdCl}_4]^{2-}$  was centrifuged for several times and washed with water. The resulting sample was poured into a solution (5 ml) of 50% hydrazine hydrate (25 mg,  $5 \times 10^{-4}$  mol). The mixture was further stirred for 8 h to yield **Pd@1**. The sample of **Pd@2** was obtained with the same procedure of **Pd@1**. ICP result indicated that *ca.* 0.92 and 1.53% of Pd (mass fraction) were loaded on the samples of **1** and **2**, respectively.

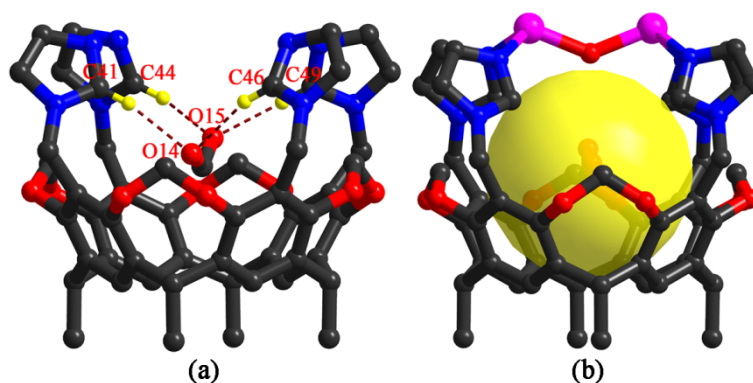

**Fig. S1.** (a) Hydrogen-bonding interactions between  $\text{HCOO}^-$  and four imidazole linkers of TMC4R. (b) Structure of the bowl-shaped  $[\text{Zn}_2(\text{TIC4R})(\mu_2\text{-OH}(\text{HCOO}))]^{2+}$  unit.

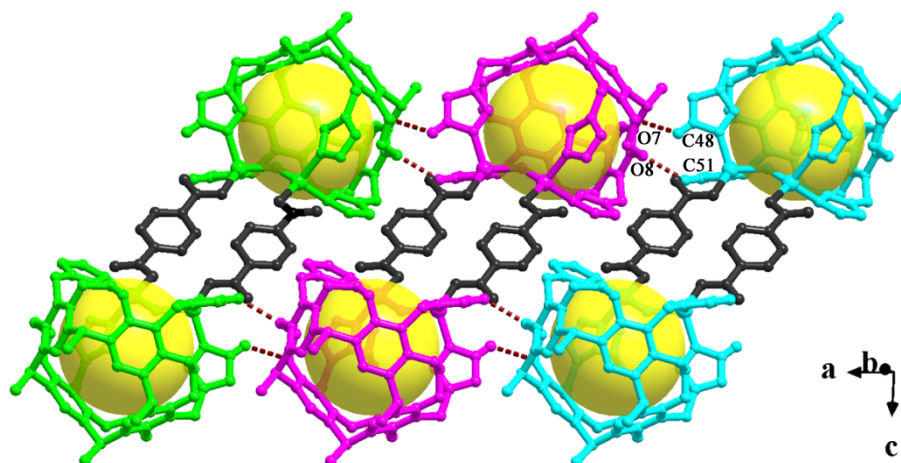

**Fig. S2.** 1D supramolecular chain linked by hydrogen-bonding interactions ( $\text{C48H} \cdots \text{O7}^{ii} = 3.087 \text{ \AA}$ ,  $\text{C51H} \cdots \text{O8}^{ii} = 3.228 \text{ \AA}$ ,  $^{ii} = -1+x, y, z$ ) for **1**.

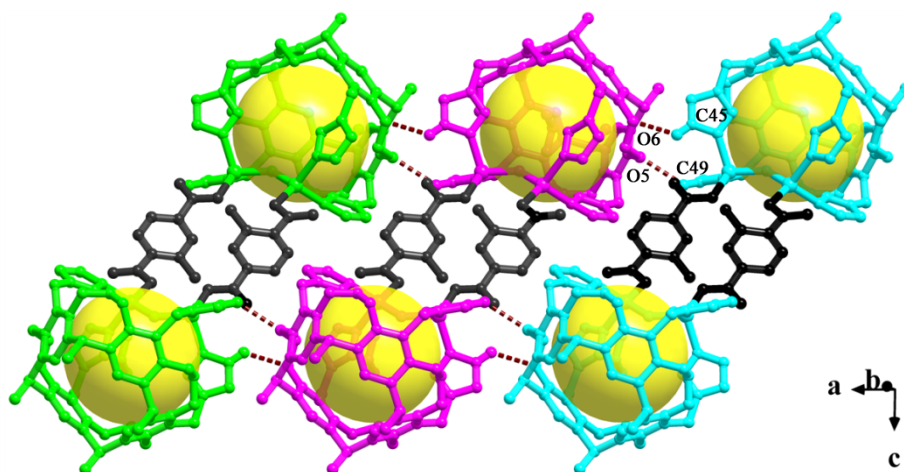

**Fig. S3.** 1D supramolecular chain linked by hydrogen-bonding interactions ( $C45H \cdots O6^{ii} = 3.103 \text{ \AA}$ ,  $C49H \cdots O5^{ii} = 3.287 \text{ \AA}$ ,  $^{ii} -x+1, -y, -z+2$ ) for **2**.

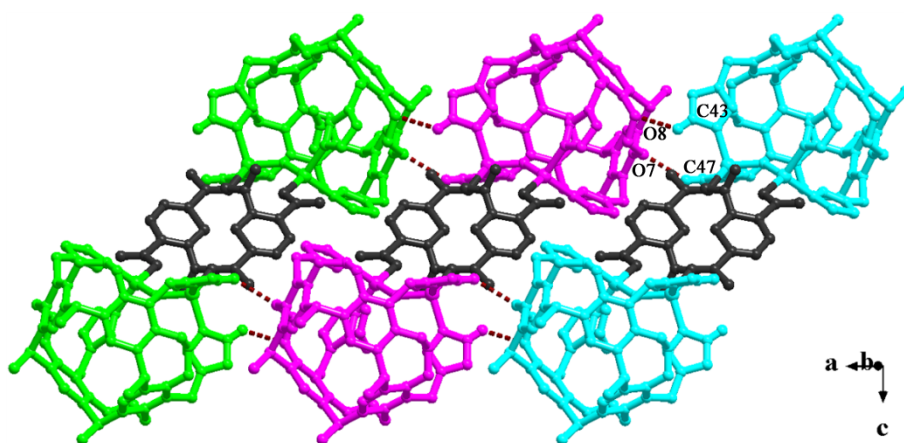

**Fig. S4.** 1D supramolecular chain linked by hydrogen-bonding interactions ( $C43H \cdots O8^{ii} = 3.148 \text{ \AA}$ ,  $C47H \cdots O7^{ii} = 3.338 \text{ \AA}$ ,  $^{ii} -x+1, -y+1, -z+1$ ) for **3**.

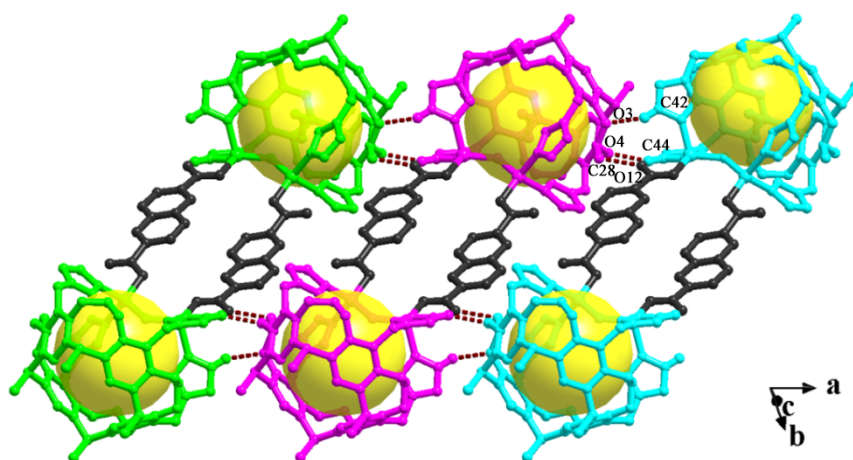

**Fig. S5.** 1D supramolecular chain linked by hydrogen-bonding interactions ( $C42H \cdots O3^{ii} = 3.112 \text{ \AA}$ ,  $C44H \cdots O4^{ii} = 3.302 \text{ \AA}$ ,  $C28H \cdots O12^{ii} = 3.266 \text{ \AA}$ ,  $^{ii} x-1, y, z$ ) for **4**.

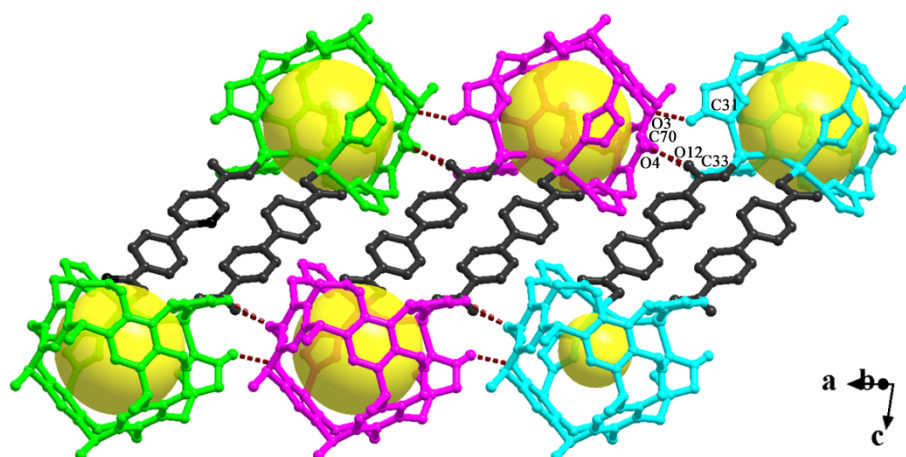

**Fig. S6.** 1D supramolecular chain linked by hydrogen-bonding interactions ( $C31H \cdots O3^i = 3.074 \text{ \AA}$ ,  $C33H \cdots O4^i = 3.372 \text{ \AA}$ ,  $C70H \cdots O12^i = 3.367 \text{ \AA}$ ,  $^i x+1, y, z$ ) for **5**.

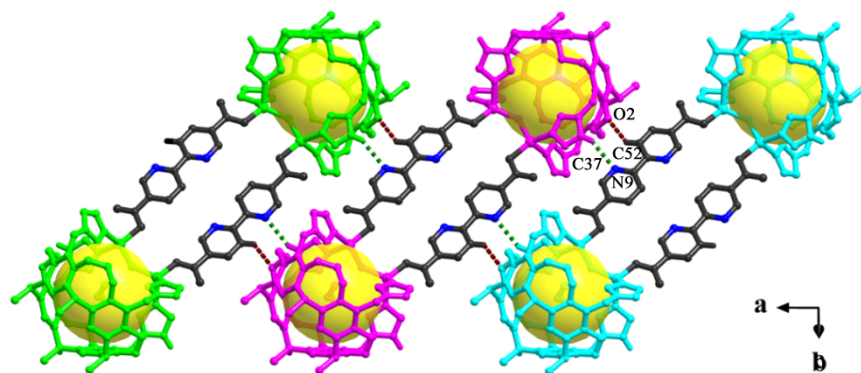

(a)

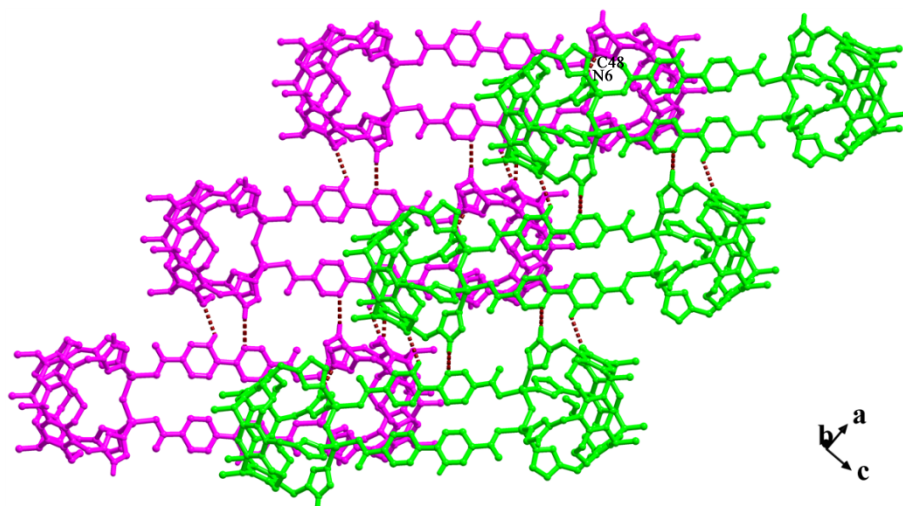

(b)



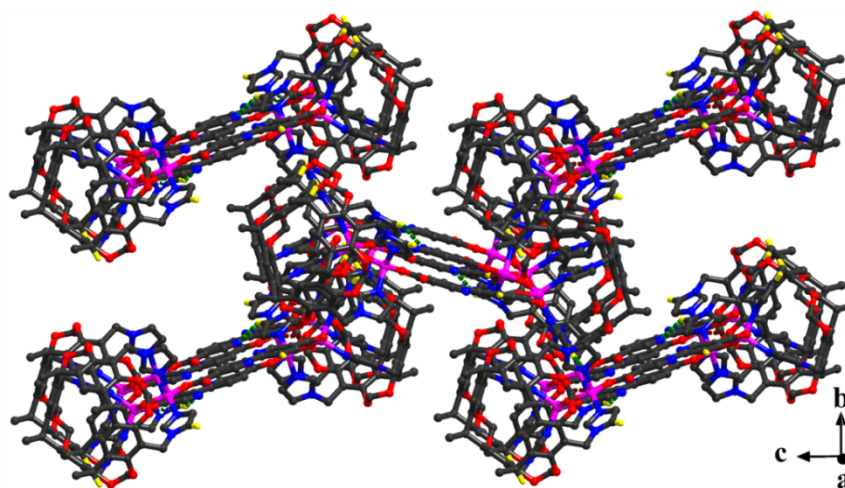

(c)

**Fig. S7.** (a) 1D supramolecular chain linked by hydrogen-bonding interactions ( $C37H \cdots N9^{ii} = 3.328 \text{ \AA}$ ,  $C52H \cdots O2^{ii} = 3.346 \text{ \AA}$ ,  $^{ii} x+1, y, z$ ) for **6**. (b) 2D supramolecular layer formed by hydrogen bonds ( $C48H \cdots N6^{iii} = 3.274 \text{ \AA}$ ,  $^{iii} -x+1/2, y+1/2, -z+1/2$ ) for **6**. (c) 3D supramolecular structure formed by hydrogen bond interactions ( $C37H \cdots N9^{ii} = 3.328 \text{ \AA}$ ,  $C52H \cdots O2^{ii} = 3.346 \text{ \AA}$ ,  $C48H \cdots N6^{iii} = 3.274 \text{ \AA}$ ,  $^{ii} x+1, y, z, ^{iii} -x+1/2, y+1/2, -z+1/2$ ) for **6**.

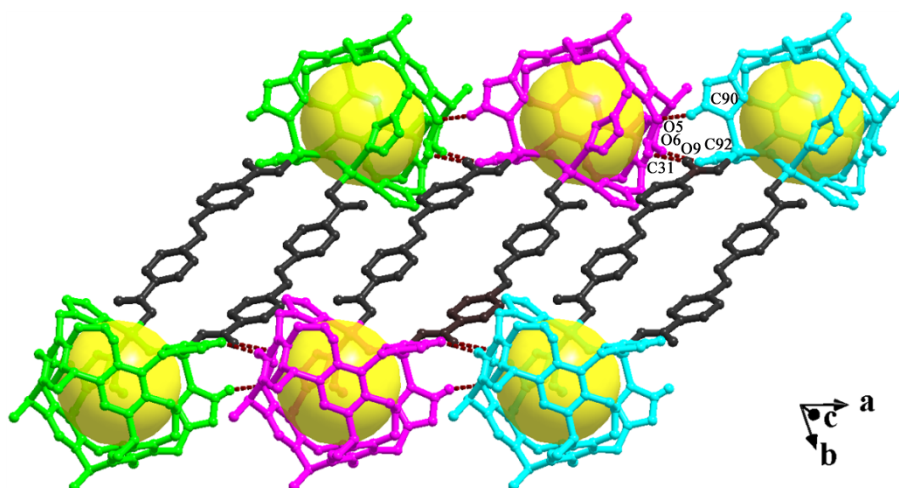

**Fig. S8.** 1D supramolecular chain linked by hydrogen-bonding interactions ( $C90H \cdots O5^{ii} = 3.093 \text{ \AA}$ ,  $C92H \cdots O6^{ii} = 3.202 \text{ \AA}$ ,  $C31H \cdots O9^{ii} = 3.202 \text{ \AA}$ ,  $^{ii} x+1, y, z$ ) for **7**.

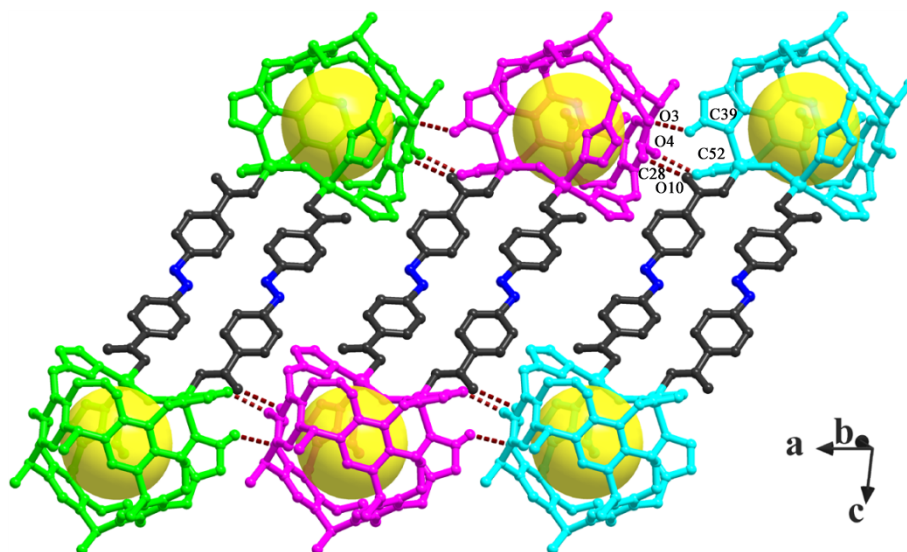

**Fig. S9.** 1D supramolecular chain linked by hydrogen-bonding interactions ( $C52H \cdots O4^{ii} = 3.181 \text{ \AA}$ ,  $C39H \cdots O3^{ii} = 3.079 \text{ \AA}$ ,  $C28H \cdots O10^{ii} = 3.390 \text{ \AA}$ ,  $^{ii} -1+x, y, z$ ) for **8**.

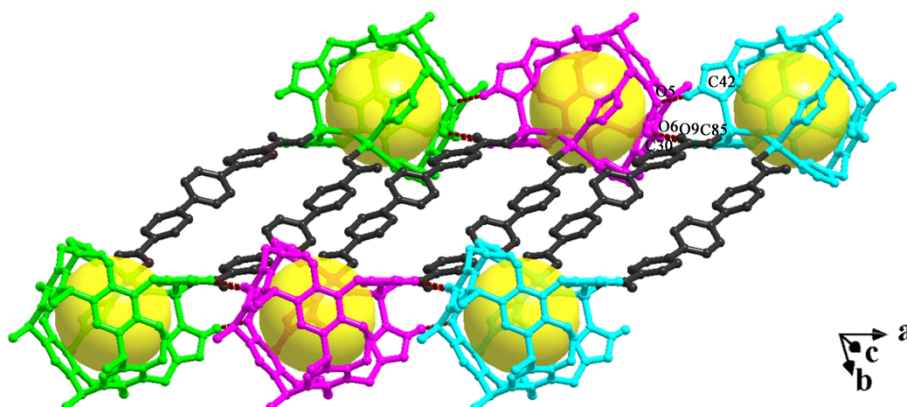

**Fig. S10.** 1D supramolecular chain linked by hydrogen-bonding interactions ( $C30H \cdots O9^{ii} = 3.323 \text{ \AA}$ ,  $C42H \cdots O5^{iii} = 3.094 \text{ \AA}$ ,  $C85H \cdots O6^{iii} = 3.251 \text{ \AA}$ ,  $^{ii} -x, -y-1, -z+1, -x, -y-1, -z+1$ ) for **9**.

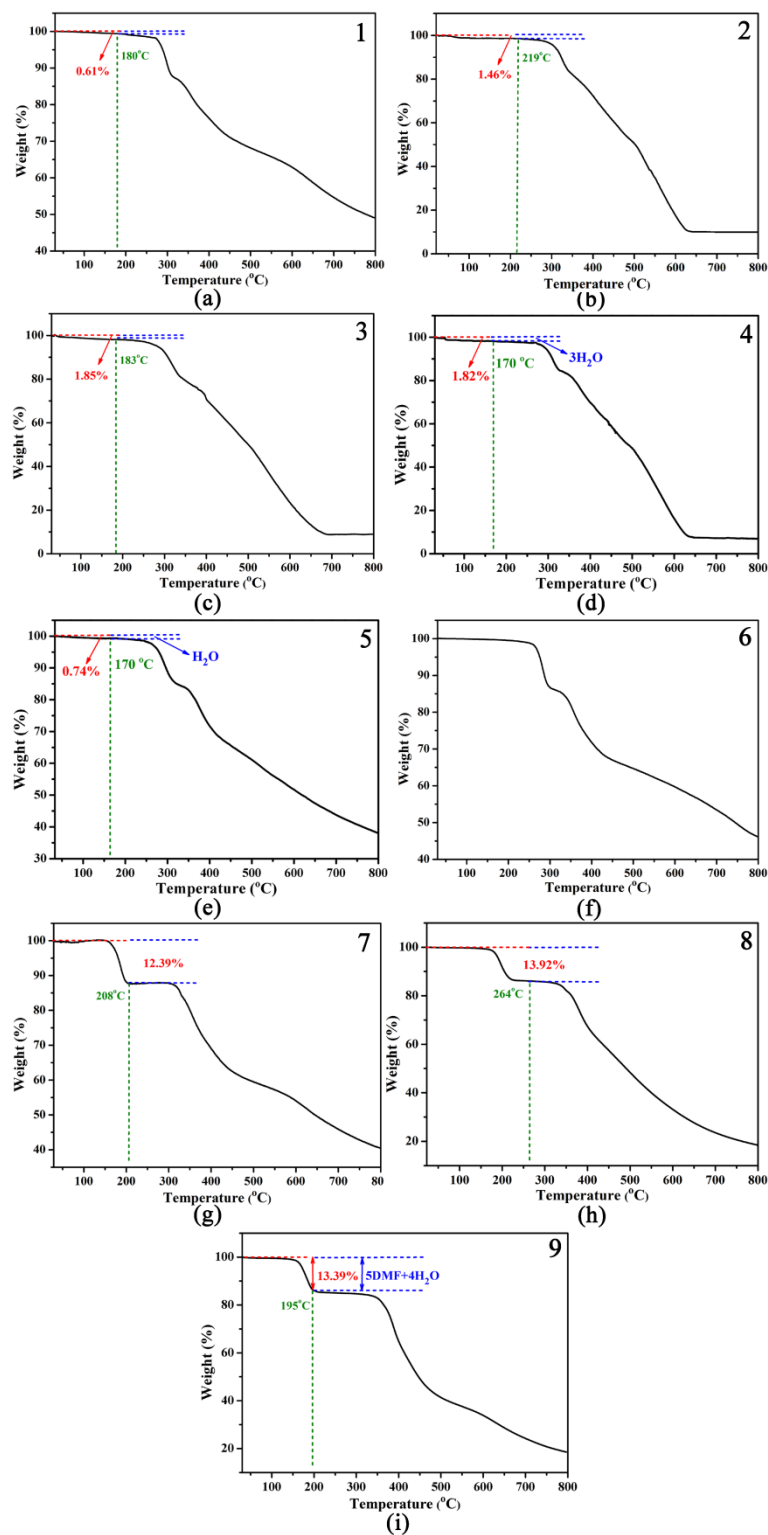

**Fig. S11.** Thermogravimetric curves of **1-9**. The weight losses of 0.61% (calcd. 10.32%), 1.46% (calcd. 10.21%), 1.85% (calcd. 10.01%), 1.82% (calcd. 2.00%), 0.74% (calcd. 0.66%), 12.39% (calcd. 13.87%), 13.92% (calcd. 13.76%) and 13.39% (calcd. 13.31%) corresponded to the solvent removal of **1-5** and **7-9**, respectively. For compounds **1-3**, their actual weight loss is lower than the calculated one. It can be attributed to the loss of solvent molecules during the storage.

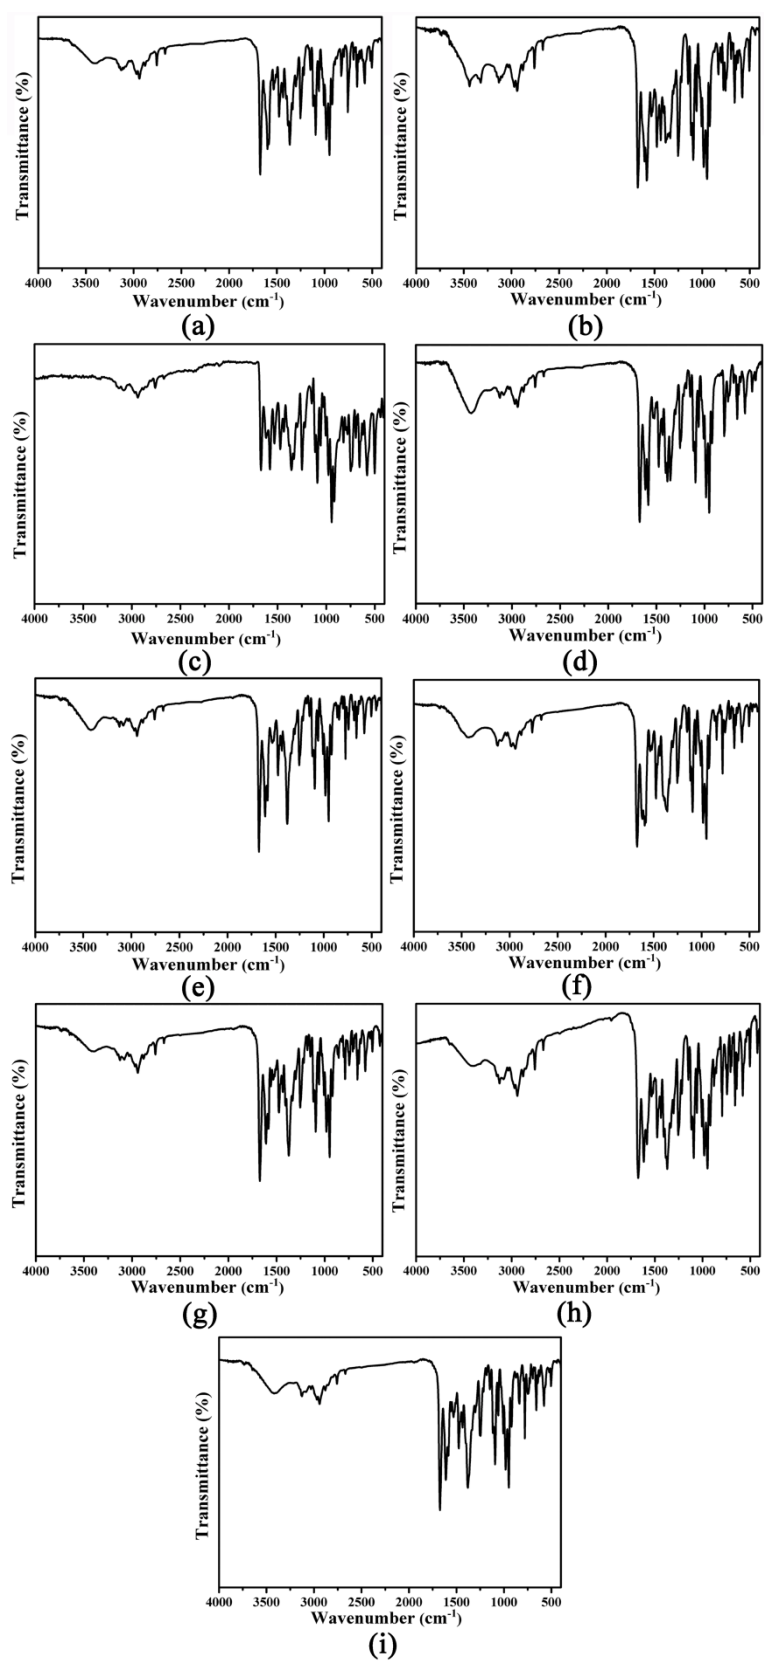

**Fig. S12.** FT-IR spectra of (a)-(i) for **1-9**, respectively.

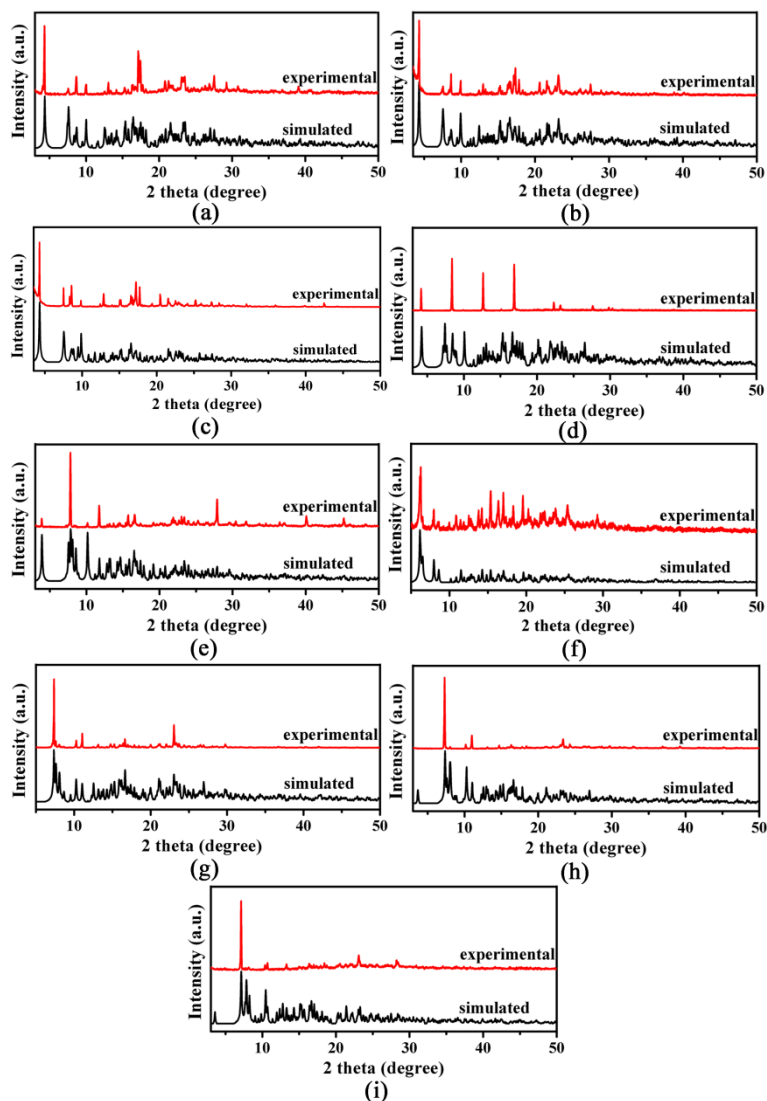

Fig. S13. PXR D patterns (a)-(i) for 1-9, respectively.

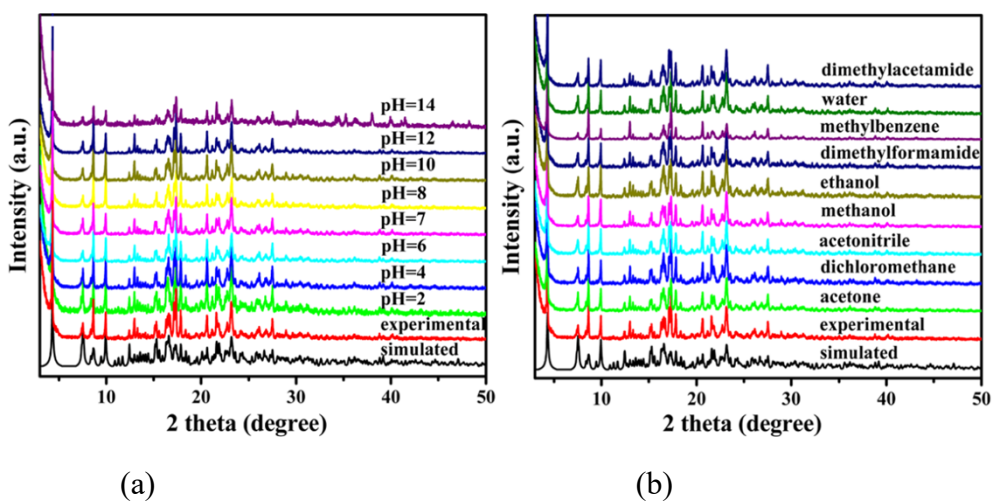

Fig. S14. PXR D patterns of 2 in aqueous solutions (pH = 2-14) (a) and organic solvents (b).

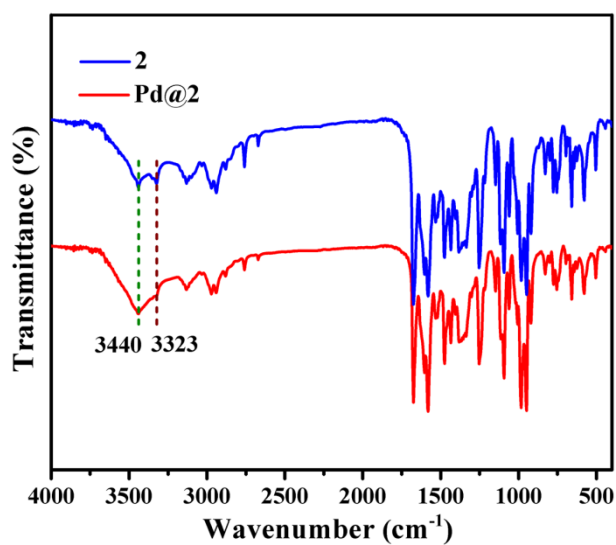

Fig. S15. FT-IR spectra of **2** and **Pd@2**.

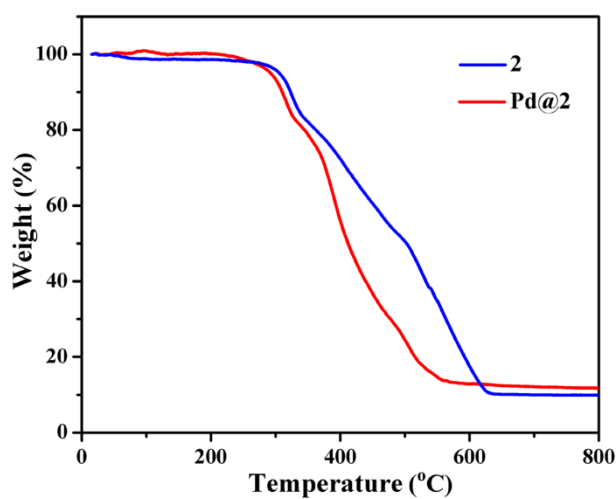

Fig. S16. Thermogravimetric curve of **2** and **Pd@2**.

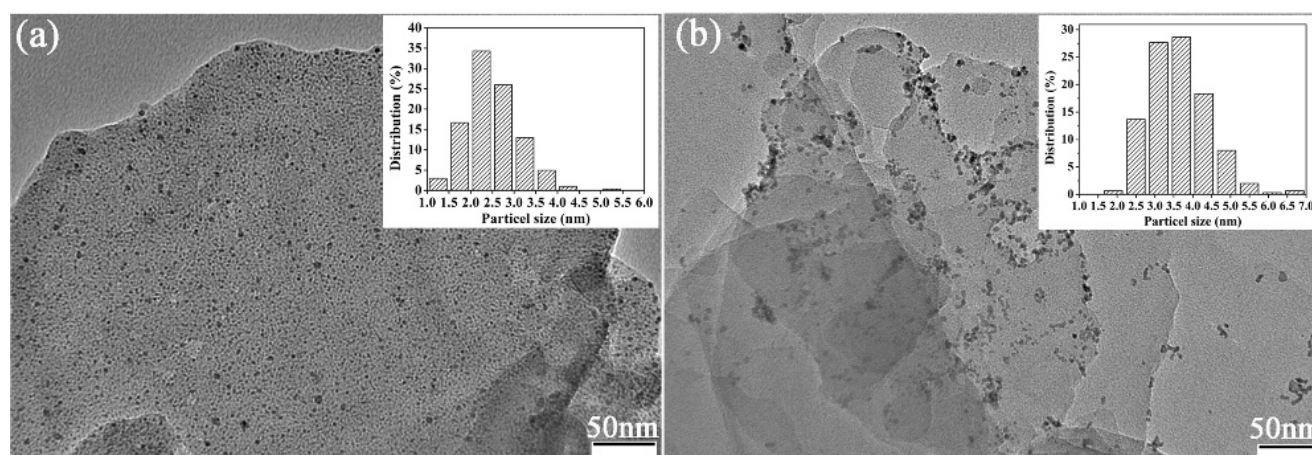

Fig. S17. TEM image of **Pd@2** (a) and **Pd@1** (b) before catalysis.

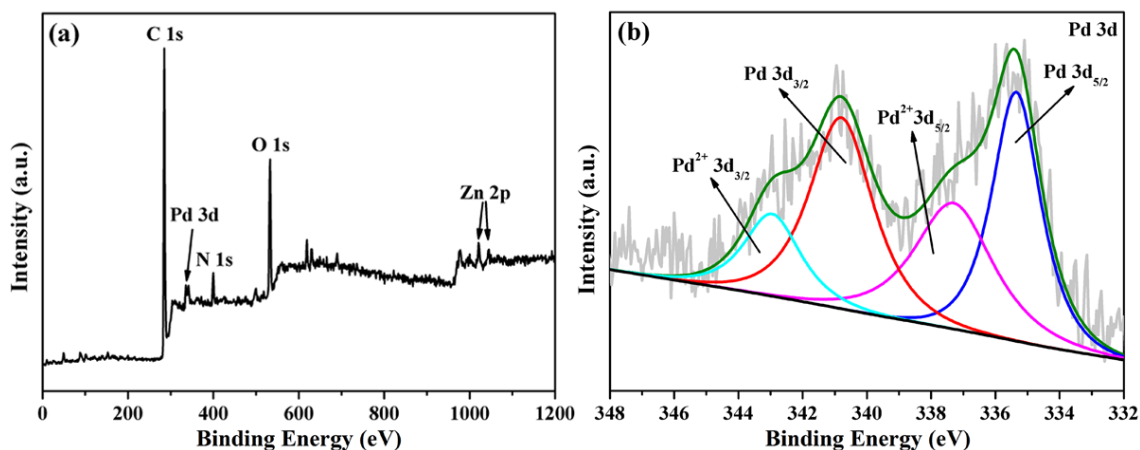

**Fig. S18.** XPS wide-scan spectrum (a) and fine Pd 3d spectrum (b) of Pd@2.

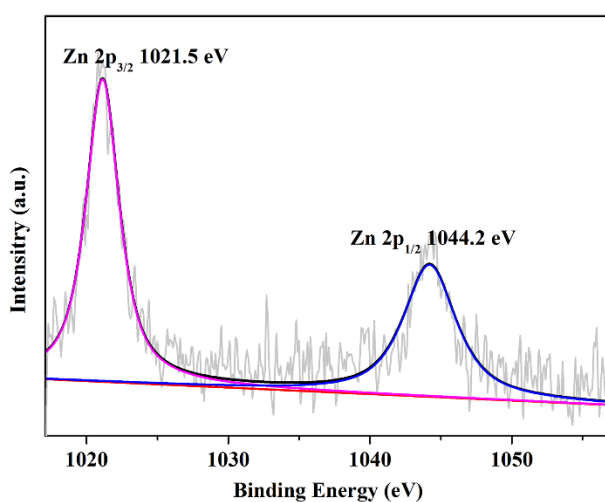

**Fig. S19.** XPS survey scans of Zn 2p.

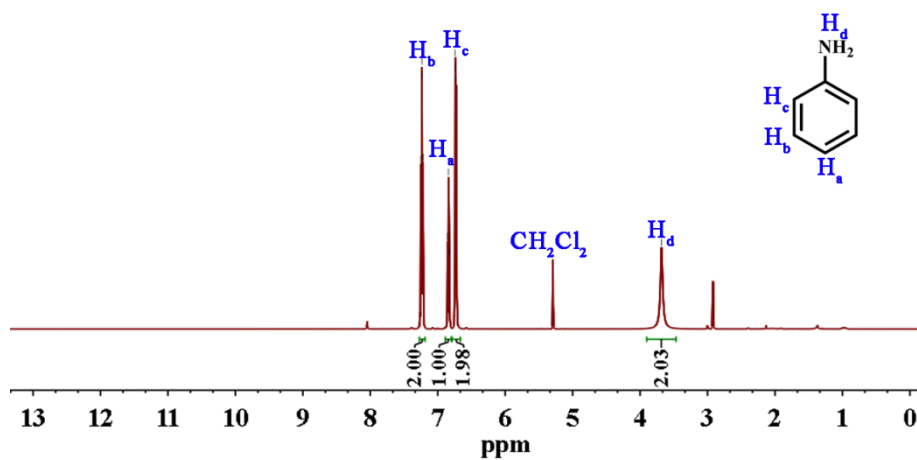

**Fig. S20.**  $^1\text{H}$  NMR spectra of the crude product from the tandem reaction of the  $\text{NH}_3\text{BH}_3$  dehydrogenation and nitrobenzene hydrogenation. To gain clear  $^1\text{H}$  NMR spectrum, amounts of the

reactant and catalyst were increased five times (nitrobenzene: 0.5 mmol, catalyst: 50 mg,  $\text{NH}_3\text{BH}_3$ : 1.5 mmol, water: 25 mL, time: 10 min, room temperature). (500 MHz,  $\text{CDCl}_3$ )  $\delta = 7.22$  (t,  $J = 7.6$  Hz, 2H), 6.84 (t,  $J = 7.4$  Hz, 1H), 6.73 (d,  $J = 7.7$  Hz, 2H), 2.03(s, 2H).

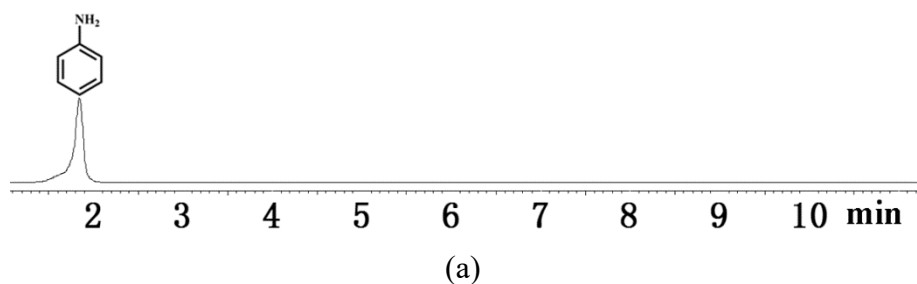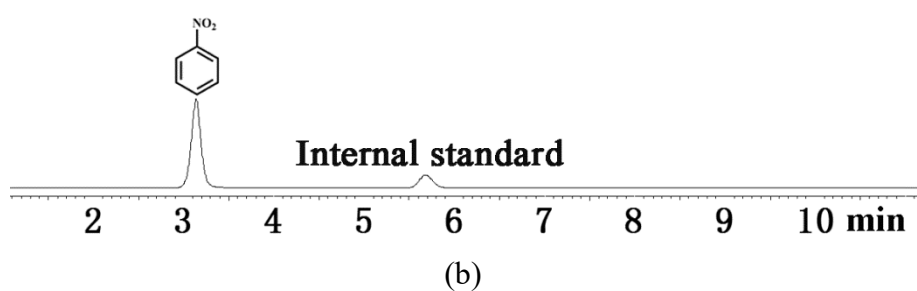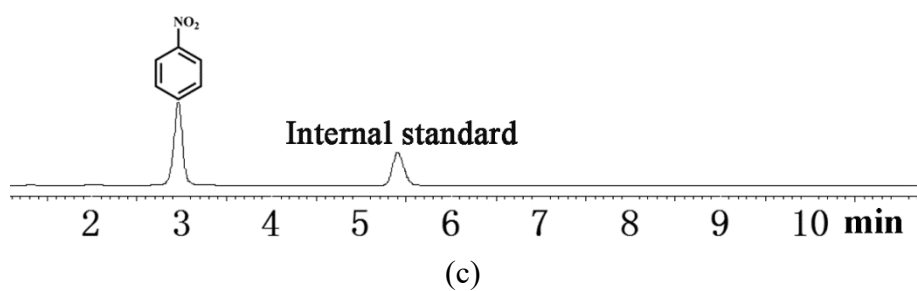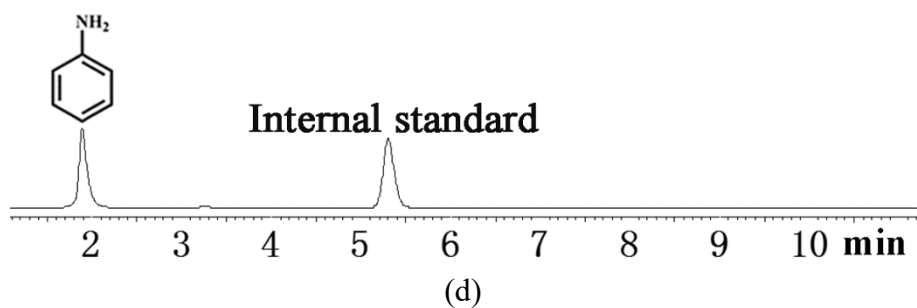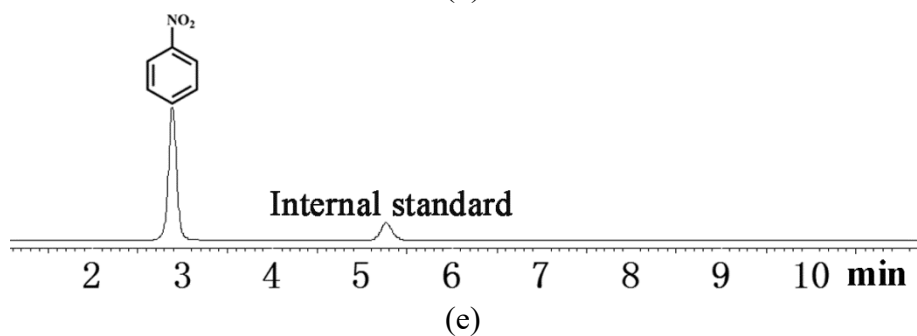



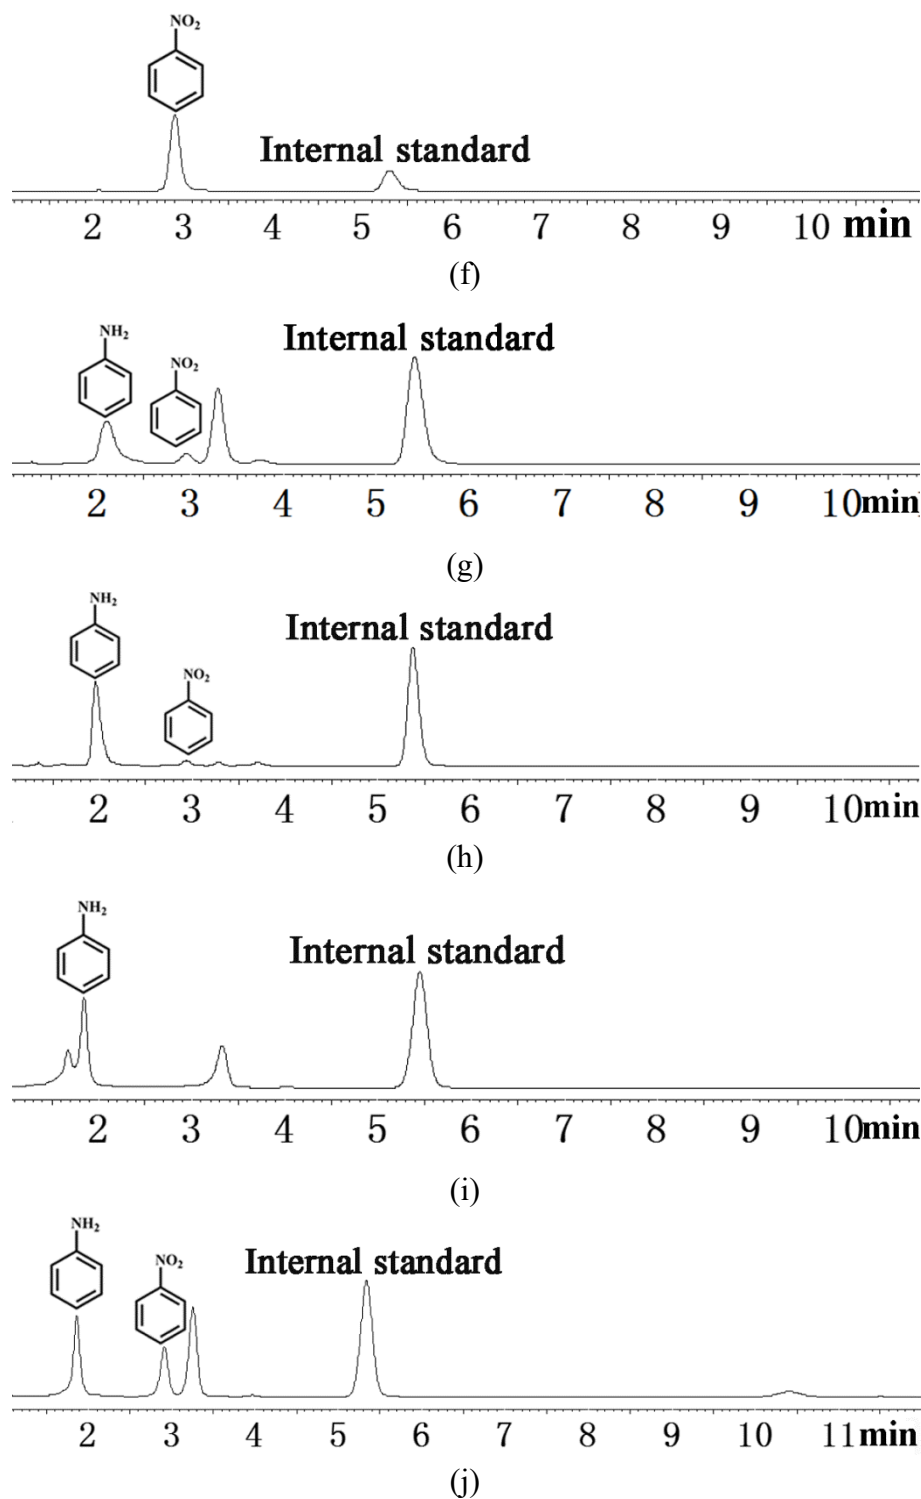

**Fig. S21.** HPLC spectra for nitrobenzene hydrogenation for 10 min at room temperature: (a) the standard aniline sample, (b) in water without catalyst and  $\text{NH}_3\text{BH}_3$  (0.3 mmol) as reductant, (c) in water with **2** (10 mg) and  $\text{NH}_3\text{BH}_3$  (0.3 mmol) as reductant, (d) in water with **Pd@2** (10 mg) and  $\text{NH}_3\text{BH}_3$  (0.3 mmol) as reductant, (e) in water with **Pd@2** (10 mg) and without  $\text{NH}_3\text{BH}_3$ , (f) in water with **Pd@2** (10 mg) at 1 atm  $\text{H}_2$ , (g) in methanol with **Pd@2** (10 mg) and  $\text{NH}_3\text{BH}_3$  (0.3 mmol) as reductant, (h) in methanol and water (v/v = 2:3) with **Pd@2** (10 mg) and  $\text{NH}_3\text{BH}_3$  (0.3 mmol) as

reductant, (i) in methanol and water (v/v = 4:1) with **Pd@2** (10 mg) and  $\text{NH}_3\text{BH}_3$  (0.3 mmol) as reductant, (j) in water with **Pd@1** (10 mg) and  $\text{NH}_3\text{BH}_3$  (0.3 mmol) as reductant.

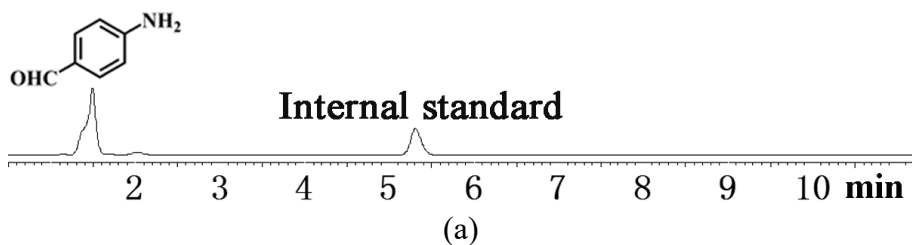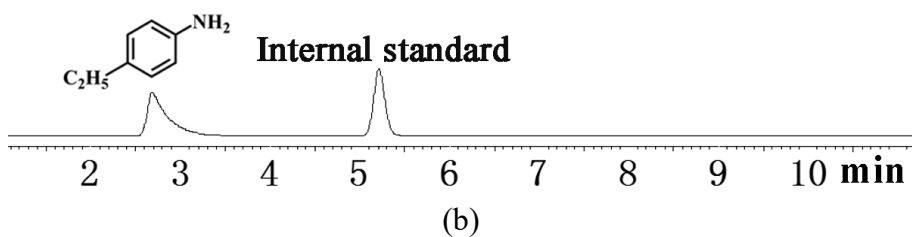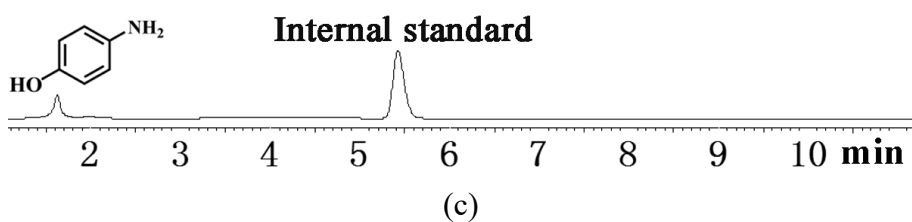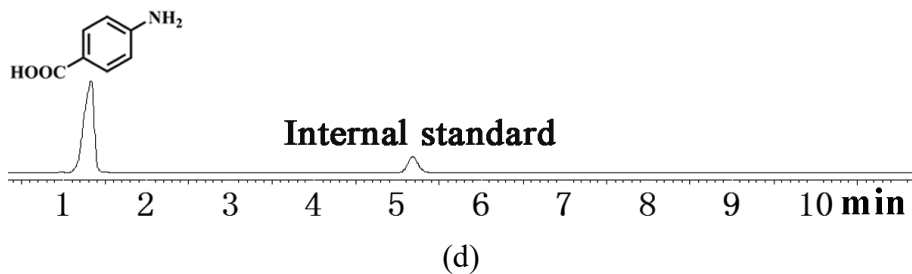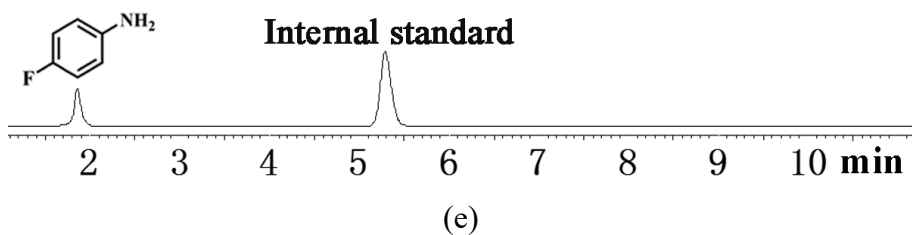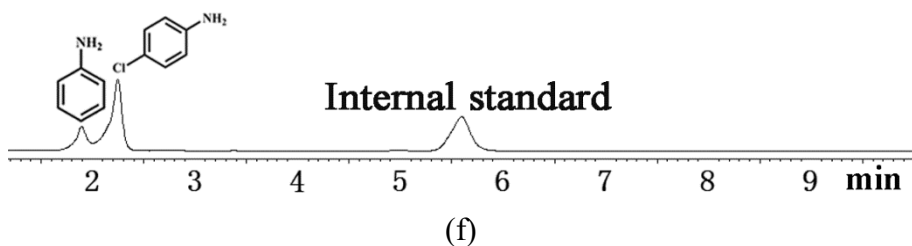

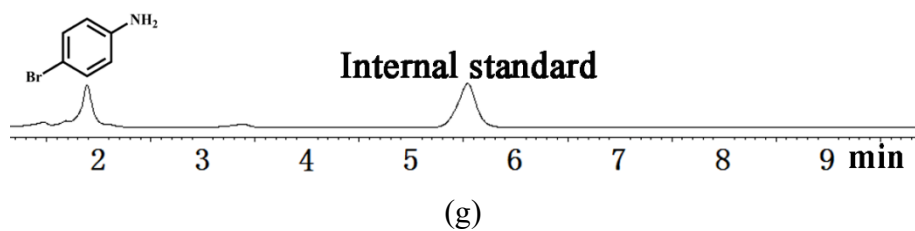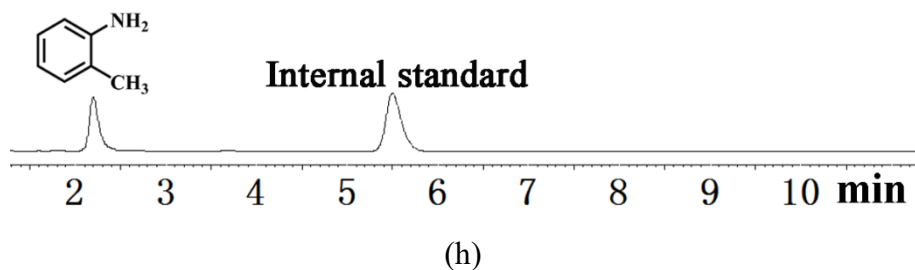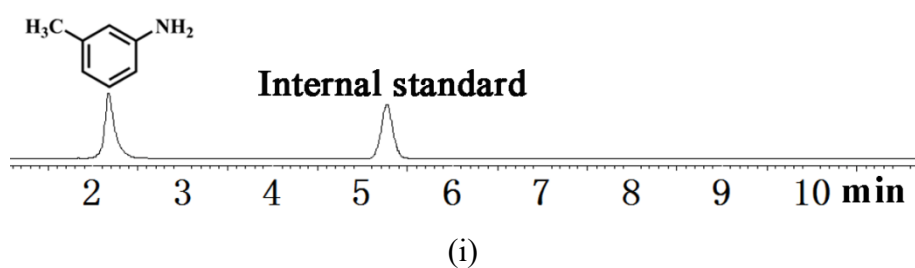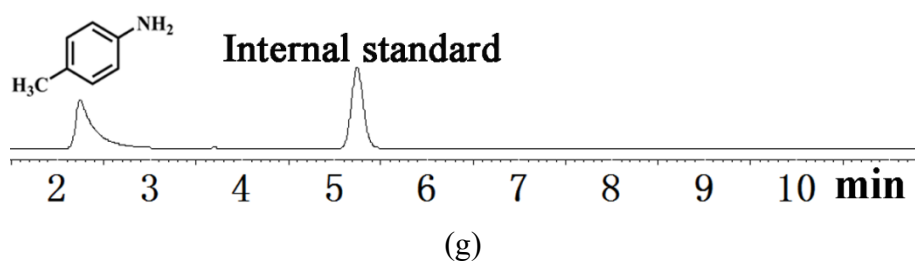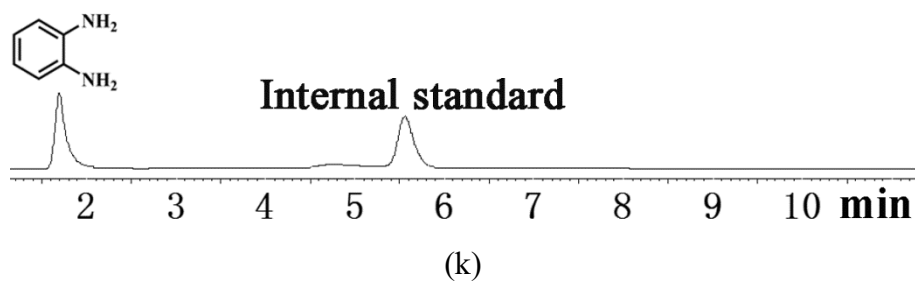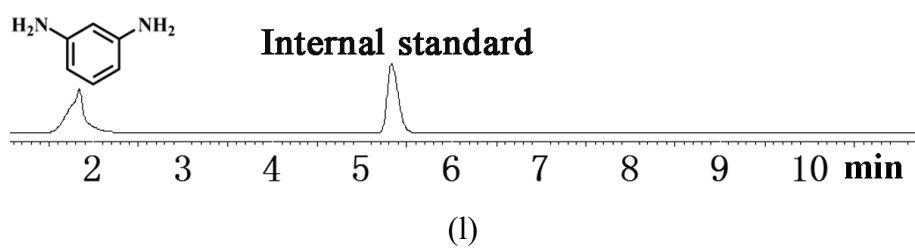

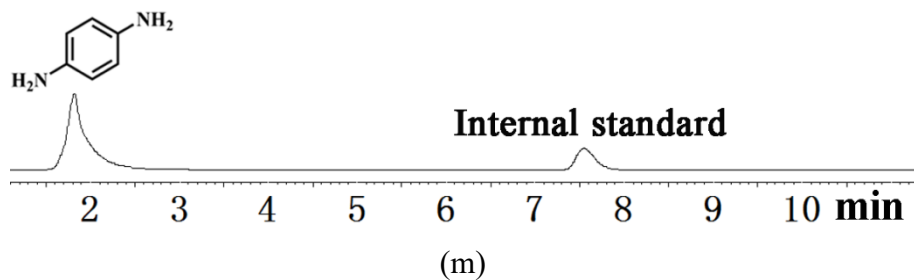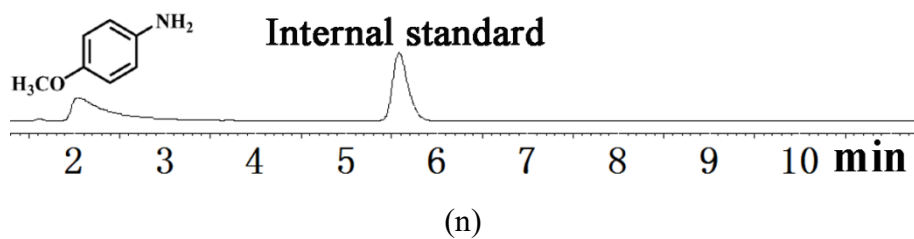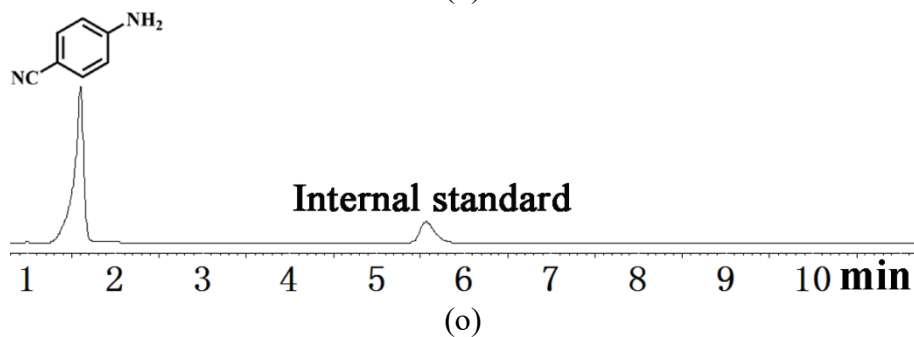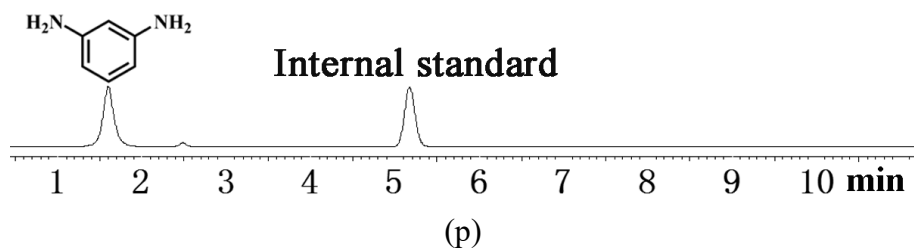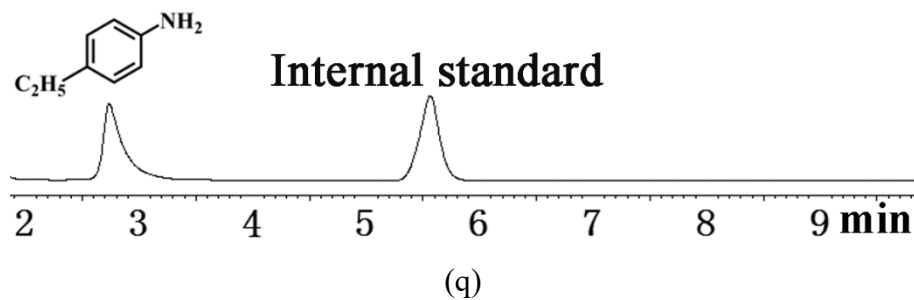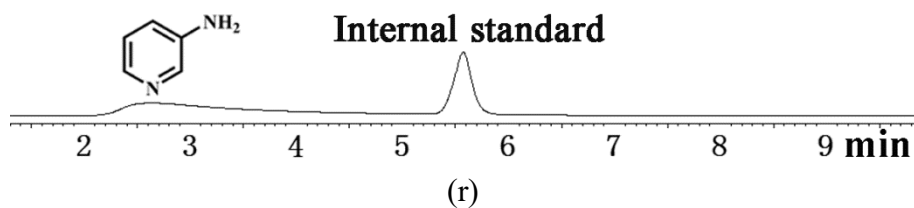

Fig. S22. HPLC spectra for the  $\text{NH}_3\text{BH}_3$  dehydrogenation and nitroarene hydrogenation with **Pd@2**

at room temperature: (a) 4-nitrobenzaldehyde, (b) 4-nitroethylbenzene, (c) 4-nitrophenol, (d) 4-nitrobenzoic acid, (e) 4-fluoronitrobenzene, (f) 4-nitrochlorobenzene, (g) 4-bromonitrobenzene, (h) 2-nitrotoluene, (i) 3-nitrotoluene, (j) 4-nitrotoluene, (k) 2-nitroaniline, (l) 3-nitroaniline, (m) 4-nitroaniline, (n) 4-nitroanisole, (o) 4-nitrobenzotrile, (p) 1,3-dinitrobenzene, (q) 4-nitroethynylbenzene, (r) 3-nitropyridine. The catalytic product was dealt with CH<sub>3</sub>OH.

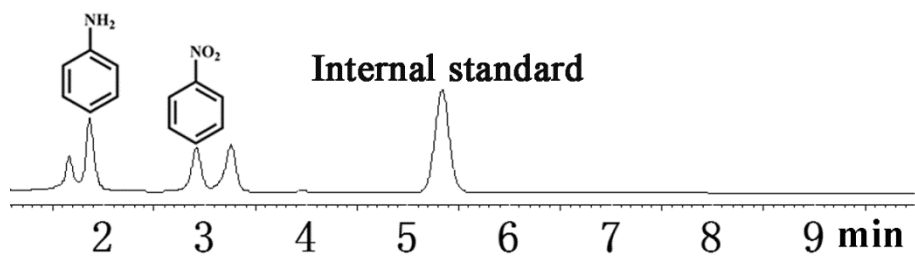

(a)

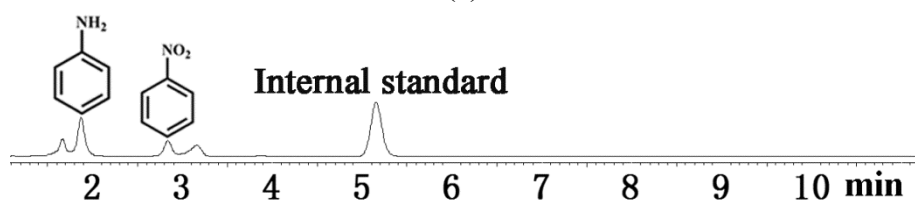

(b)

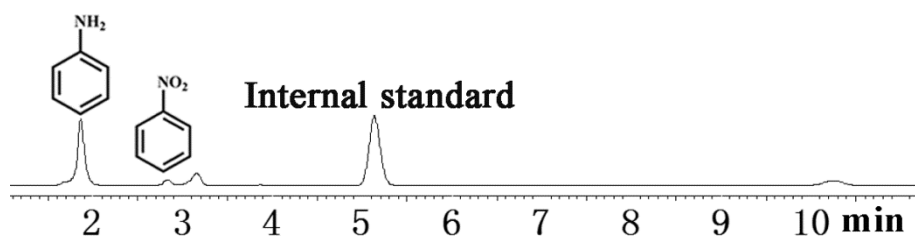

(c)

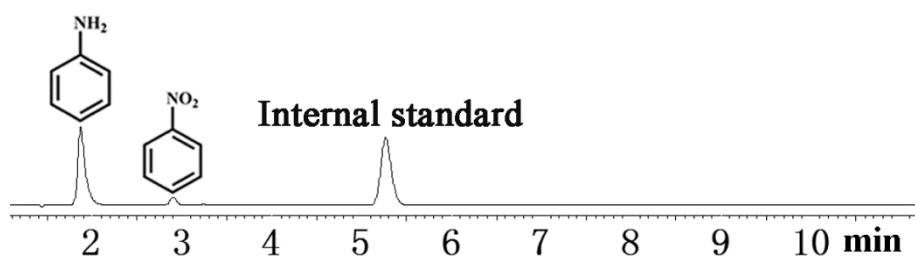

(d)

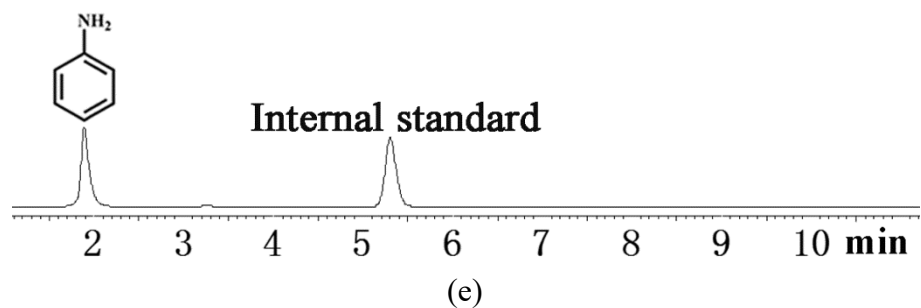

**Fig. S23.** HPLC Spectra of the  $\text{NH}_3\text{BH}_3$  dehydrogenation and nitrobenzene hydrogenation at room temperature: (a) 10 mg **Pd@2** as catalyst for 2 min, (b) 10 mg **Pd@2** as catalyst for 4 min, (c) 10 mg **Pd@2** as catalyst for 6 min, (d) 10 mg **Pd@2** as catalyst for 8 min and (e) 10 mg **Pd@2** as catalyst for 10 min.

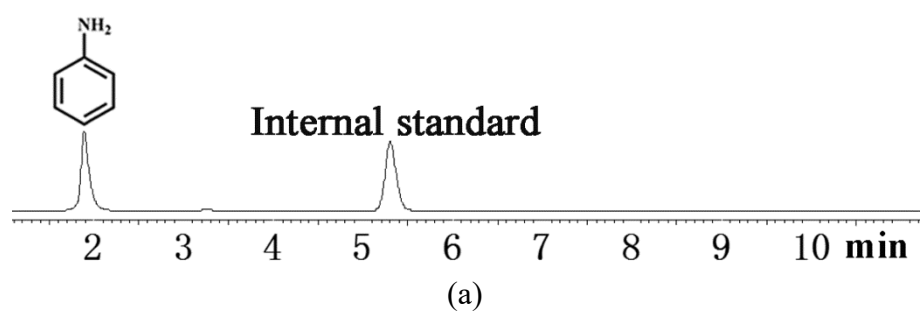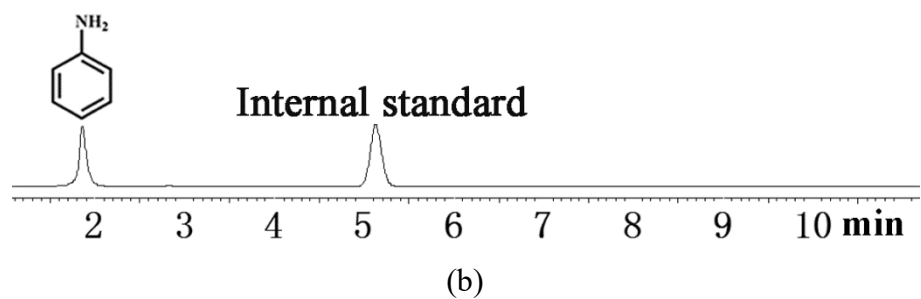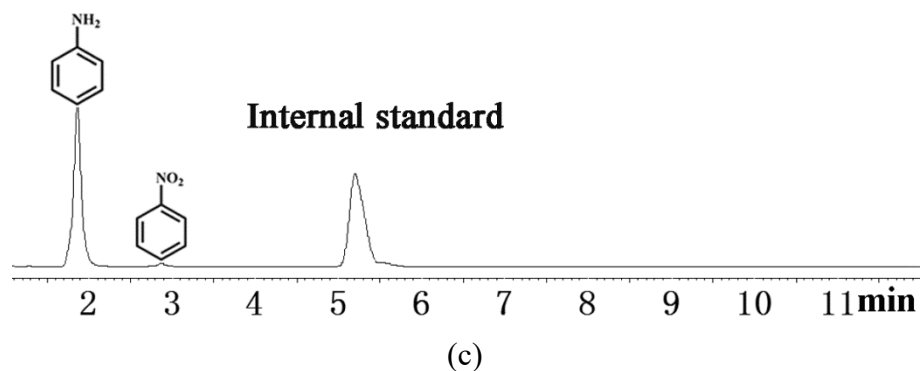

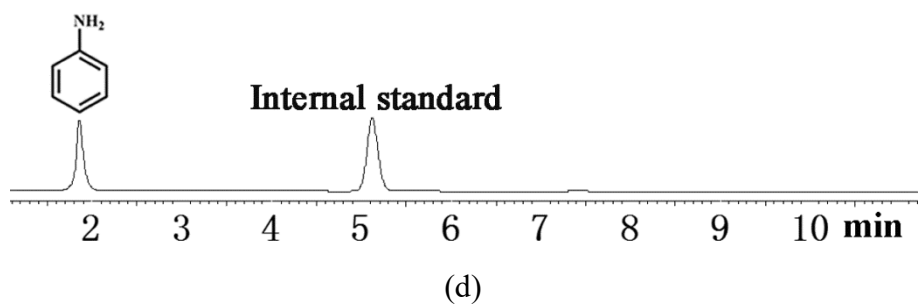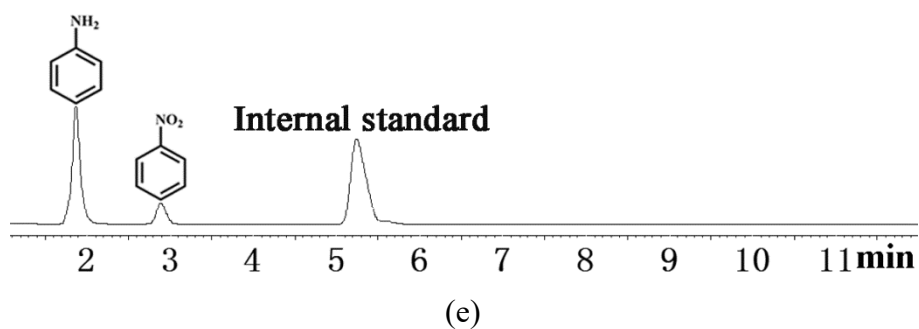

**Fig. S24.** HPLC spectra of tandem reaction for the recycled experiments with **Pd@2**: (a) the first cycle, (b) the second cycle, (c) the third cycle, (d) the fourth cycle and (e) the fifth cycle.

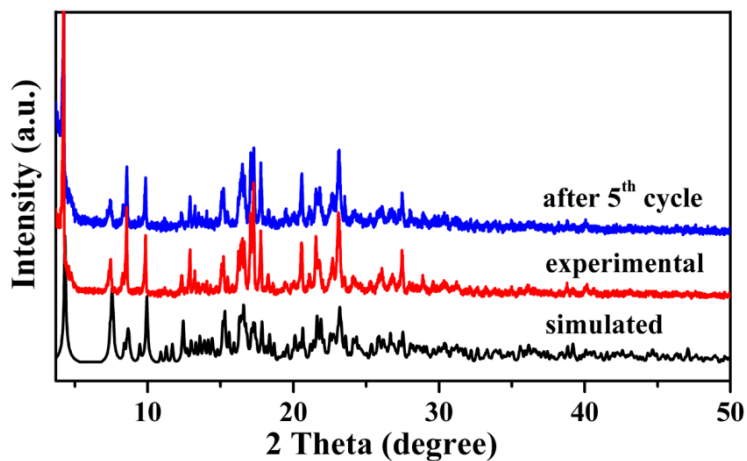

**Fig. S25.** PXRD patterns: the simulated **2** (black), the experimental **2** (red) and that after five cycles with **Pd@2** (blue).

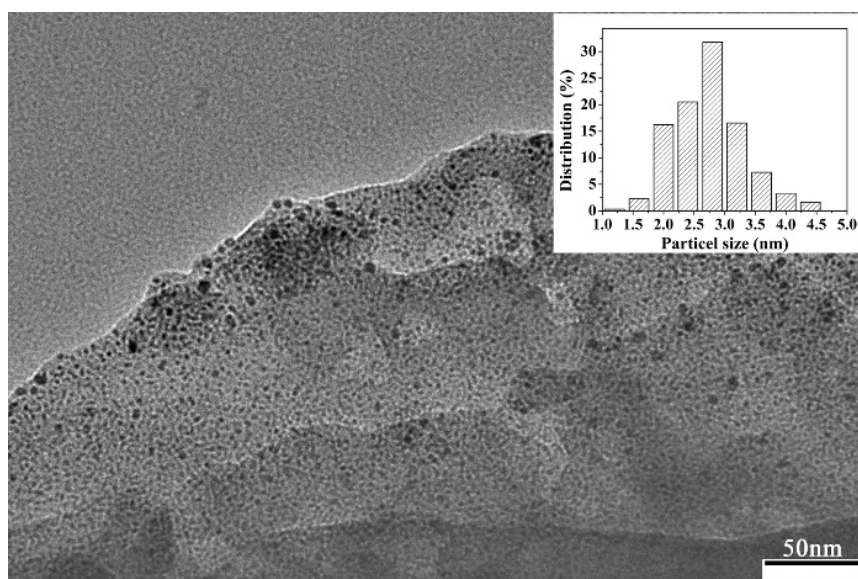

**Fig. S26.** TEM image of Pd@2 after the recycling tests.

**Table S1.** Crystallographic data for 1-8.

| Compound                                                       | 1                                | 2                                | 3                                |
|----------------------------------------------------------------|----------------------------------|----------------------------------|----------------------------------|
| Formula                                                        | $C_{134}H_{136}N_{20}O_{34}Zn_4$ | $C_{134}H_{138}N_{22}O_{34}Zn_4$ | $C_{134}H_{134}N_{22}O_{38}Zn_4$ |
| <i>Mr</i>                                                      | 2832.10                          | 2862.29                          | 2922.09                          |
| Crystal system                                                 | Triclinic                        | Triclinic                        | Triclinic                        |
| Space group                                                    | <i>P</i> -1                      | <i>P</i> -1                      | <i>P</i> -1                      |
| <i>a</i> (Å)                                                   | 12.6235(7)                       | 12.6328(5)                       | 12.6584(5)                       |
| <i>b</i> (Å)                                                   | 13.2691(7)                       | 13.2282(5)                       | 13.2356(5)                       |
| <i>c</i> (Å)                                                   | 20.9836(12)                      | 21.1070(8)                       | 21.2394(9)                       |
| $\alpha$ (°)                                                   | 75.250(5)                        | 75.676(3)                        | 75.538(4)                        |
| $\beta$ (°)                                                    | 84.917(5)                        | 86.550(3)                        | 86.914(3)                        |
| $\gamma$ (°)                                                   | 66.924(5)                        | 67.967(4)                        | 67.873(4)                        |
| <i>V</i> (Å <sup>3</sup> )                                     | 3126.8(3)                        | 3165.8(2)                        | 3188.7(2)                        |
| <i>Z</i>                                                       | 1                                | 1                                | 1                                |
| <i>T</i> (K)                                                   | 298                              | 298                              | 298                              |
| <i>D</i> <sub>calc</sub> (g cm <sup>-3</sup> )                 | 1.504                            | 1.501                            | 1.521                            |
| <i>F</i> (000)                                                 | 1472                             | 1488                             | 1514                             |
| <i>R</i> <sub>int</sub>                                        | 0.0372                           | 0.0274                           | 0.0319                           |
| GOF on <i>F</i> <sup>2</sup>                                   | 1.056                            | 1.060                            | 1.044                            |
| <i>R</i> <sub>1</sub> <sup>a</sup> [ <i>I</i> >2σ( <i>I</i> )] | 0.0548                           | 0.0505                           | 0.0784                           |
| <i>wR</i> <sub>2</sub> <sup>b</sup> (all data)                 | 0.1423                           | 0.1473                           | 0.2508                           |



| Compound                                                       | <b>4</b>                                                                          | <b>5</b>                                                                          | <b>6</b>                                                                          |
|----------------------------------------------------------------|-----------------------------------------------------------------------------------|-----------------------------------------------------------------------------------|-----------------------------------------------------------------------------------|
| Formula                                                        | C <sub>130</sub> H <sub>118</sub> N <sub>16</sub> O <sub>33</sub> Zn <sub>4</sub> | C <sub>134</sub> H <sub>118</sub> N <sub>16</sub> O <sub>31</sub> Zn <sub>4</sub> | C <sub>130</sub> H <sub>112</sub> N <sub>20</sub> O <sub>30</sub> Zn <sub>4</sub> |
| <i>Mr</i>                                                      | 2693.88                                                                           | 2709.92                                                                           | 2695.87                                                                           |
| Crystal system                                                 | Triclinic                                                                         | Triclinic                                                                         | Monoclinic                                                                        |
| Space group                                                    | <i>P</i> -1                                                                       | <i>P</i> -1                                                                       | <i>P</i> 21/ <i>n</i>                                                             |
| <i>a</i> (Å)                                                   | 12.7117(5)                                                                        | 12.6930(6)                                                                        | 15.9426(8)                                                                        |
| <i>b</i> (Å)                                                   | 13.3519(9)                                                                        | 13.1976(8)                                                                        | 15.3658(7)                                                                        |
| <i>c</i> (Å)                                                   | 21.3024(16)                                                                       | 22.9243(15)                                                                       | 28.7074(15)                                                                       |
| $\alpha$ (°)                                                   | 78.814(6)                                                                         | 81.532(5)                                                                         | 90                                                                                |
| $\beta$ (°)                                                    | 85.301(5)                                                                         | 80.885(5)                                                                         | 91.722(4)                                                                         |
| $\gamma$ (°)                                                   | 69.705(5)                                                                         | 67.896(5)                                                                         | 90                                                                                |
| <i>V</i> (Å <sup>3</sup> )                                     | 3326.3(4)                                                                         | 3496.9(4)                                                                         | 7029.3(6)                                                                         |
| <i>Z</i>                                                       | 1                                                                                 | 1                                                                                 | 2                                                                                 |
| <i>T</i> (K)                                                   | 298                                                                               | 298                                                                               | 298                                                                               |
| <i>D</i> <sub>calc</sub> (g cm <sup>-3</sup> )                 | 1.345                                                                             | 1.287                                                                             | 1.274                                                                             |
| <i>F</i> (000)                                                 | 1394                                                                              | 1402                                                                              | 2784                                                                              |
| <i>R</i> <sub>int</sub>                                        | 0.0302                                                                            | 0.0265                                                                            | 0.0301                                                                            |
| GOF on <i>F</i> <sup>2</sup>                                   | 1.012                                                                             | 1.044                                                                             | 1.046                                                                             |
| <i>R</i> <sub>1</sub> <sup>a</sup> [ <i>I</i> >2σ( <i>I</i> )] | 0.0492                                                                            | 0.0466                                                                            | 0.0514                                                                            |
| <i>wR</i> <sub>2</sub> <sup>b</sup> (all data)                 | 0.1206                                                                            | 0.1213                                                                            | 0.1495                                                                            |
| Compound                                                       | <b>7</b>                                                                          | <b>8</b>                                                                          | <b>9</b>                                                                          |
| Formula                                                        | C <sub>156</sub> H <sub>142</sub> N <sub>22</sub> O <sub>36</sub> Zn <sub>4</sub> | C <sub>152</sub> H <sub>158</sub> N <sub>26</sub> O <sub>36</sub> Zn <sub>4</sub> | C <sub>161</sub> H <sub>167</sub> N <sub>21</sub> O <sub>39</sub> Zn <sub>4</sub> |
| <i>Mr</i>                                                      | 3162.39                                                                           | 3186.51                                                                           | 3281.63                                                                           |
| Crystal system                                                 | Triclinic                                                                         | Triclinic                                                                         | Triclinic                                                                         |
| Space group                                                    | <i>P</i> -1                                                                       | <i>P</i> -1                                                                       | <i>P</i> -1                                                                       |
| <i>a</i> (Å)                                                   | 12.5964(4)                                                                        | 12.5628(5)                                                                        | 12.6324(5)                                                                        |
| <i>b</i> (Å)                                                   | 13.2279(6)                                                                        | 13.2187(5)                                                                        | 13.1859(5)                                                                        |
| <i>c</i> (Å)                                                   | 24.2610(12)                                                                       | 24.0978(9)                                                                        | 25.2091(10)                                                                       |
| $\alpha$ (°)                                                   | 86.566(4)                                                                         | 86.376(3)                                                                         | 89.431(3)                                                                         |
| $\beta$ (°)                                                    | 81.593(3)                                                                         | 81.813(3)                                                                         | 79.959(4)                                                                         |
| $\gamma$ (°)                                                   | 68.079(4)                                                                         | 67.430(4)                                                                         | 68.233(4)                                                                         |
| <i>V</i> (Å <sup>3</sup> )                                     | 3709.8(3)                                                                         | 3657.5(3)                                                                         | 3833.1(3)                                                                         |
| <i>Z</i>                                                       | 1                                                                                 | 1                                                                                 | 1                                                                                 |
| <i>T</i> (K)                                                   | 298                                                                               | 298                                                                               | 298                                                                               |
| <i>D</i> <sub>calc</sub> (g cm <sup>-3</sup> )                 | 1.416                                                                             | 1.447                                                                             | 1.422                                                                             |

|                              |        |        |        |
|------------------------------|--------|--------|--------|
| F(000)                       | 1640   | 1660   | 1712   |
| $R_{\text{int}}$             | 0.0413 | 0.0312 | 0.0306 |
| GOF on $F^2$                 | 1.041  | 1.027  | 0.990  |
| $R_1^a$ [ $I > 2\sigma(I)$ ] | 0.0649 | 0.0652 | 0.0451 |
| $wR_2^b$ (all data)          | 0.1921 | 0.1816 | 0.1064 |

$$^a R_1 = \frac{\sum ||F_o| - |F_c||}{\sum |F_o|}, \quad ^b wR_2 = \left\{ \frac{\sum [w(F_o^2 - F_c^2)^2]}{\sum w(F_o^2)^2} \right\}^{1/2}$$

**Table S2.** Selected bond lengths [Å] and angles [deg] for **1**.

| <b>1</b>                       |            |                          |            |
|--------------------------------|------------|--------------------------|------------|
| Zn(1)-O(9)                     | 1.919(2)   | Zn(1)-O(13) <sup>i</sup> | 1.935(2)   |
| Zn(1)-N(8)                     | 2.025(3)   | Zn(1)-N(6)               | 2.040(3)   |
| Zn(2)-O(9)                     | 1.909(3)   | Zn(2)-O(11)              | 1.934(2)   |
| Zn(2)-N(2)                     | 2.030(3)   | Zn(2)-N(4)               | 2.044(3)   |
| O(9)-Zn(1)-O(13) <sup>i</sup>  | 109.93(11) | O(9)-Zn(1)-N(8)          | 109.87(12) |
| O(13) <sup>i</sup> -Zn(1)-N(8) | 112.53(12) | O(9)-Zn(1)-N(6)          | 104.80(12) |
| O(13) <sup>i</sup> -Zn(1)-N(6) | 120.64(12) | N(8)-Zn(1)-N(6)          | 98.19(12)  |
| O(9)-Zn(2)-O(11)               | 109.65(12) | O(9)-Zn(2)-N(2)          | 106.49(12) |
| O(11)-Zn(2)-N(2)               | 118.60(12) | O(9)-Zn(2)-N(4)          | 110.29(12) |
| O(11)-Zn(2)-N(4)               | 113.39(12) | N(2)-Zn(2)-N(4)          | 97.70(12)  |

Symmetry code: <sup>i</sup> -x+1, -y, -z+2.

**Table S3.** Selected bond lengths [Å] and angles [deg] for **2**.

| <b>2</b>    |          |            |          |
|-------------|----------|------------|----------|
| Zn(1)-O(13) | 1.916(3) | Zn(1)-O(9) | 1.931(3) |
| Zn(1)-N(6)  | 2.029(3) | Zn(1)-N(7) | 2.036(3) |

|                                |            |                          |            |
|--------------------------------|------------|--------------------------|------------|
| Zn(2)-O(13)                    | 1.905(3)   | Zn(2)-O(12) <sup>i</sup> | 1.937(3)   |
| Zn(2)-N(4)                     | 2.027(3)   | Zn(2)-N(2)               | 2.040(3)   |
| O(13)-Zn(1)-O(9)               | 110.28(11) | O(13)-Zn(1)-N(6)         | 109.89(13) |
| O(9)-Zn(1)-N(6)                | 112.66(13) | O(13)-Zn(1)-N(7)         | 104.77(13) |
| O(9)-Zn(1)-N(7)                | 120.51(13) | N(6)-Zn(1)-N(7)          | 97.78(13)  |
| O(13)-Zn(2)-O(12) <sup>i</sup> | 110.45(12) | O(13)-Zn(2)-N(4)         | 106.58(13) |
| O(12) <sup>i</sup> -Zn(2)-N(4) | 117.97(13) | O(13)-Zn(2)-N(2)         | 110.21(13) |
| O(12) <sup>i</sup> -Zn(2)-N(2) | 113.48(12) | N(4)-Zn(2)-N(2)          | 97.30(14)  |

Symmetry code: <sup>i</sup> -x-1, -y+1, -z.

**Table S4.** Selected bond lengths [Å] and angles [deg] for **3**.

| <b>3</b>                       |            |                          |            |
|--------------------------------|------------|--------------------------|------------|
| Zn(1)-O(11)                    | 1.914(4)   | Zn(1)-O(14) <sup>i</sup> | 1.990(5)   |
| Zn(1)-N(4)                     | 2.028(5)   | Zn(1)-N(6)               | 2.024(3)   |
| Zn(2)-O(11)                    | 1.904(4)   | Zn(2)-O(12)              | 1.931(4)   |
| Zn(2)-N(2)                     | 2.035(5)   | Zn(2)-N(8)               | 2.028(4)   |
| O(11)-Zn(1)-O(14) <sup>i</sup> | 112.64(19) | O(11)-Zn(1)-N(4)         | 104.77(18) |
| O(14) <sup>i</sup> -Zn(1)-N(4) | 121.20(2)  | O(11)-Zn(1)-N(6)         | 109.83(18) |
| O(14) <sup>i</sup> -Zn(1)-N(6) | 109.40(2)  | N(6)-Zn(1)-N(4)          | 97.71(19)  |
| O(11)-Zn(2)-O(12)              | 112.25(19) | O(11)-Zn(2)-N(2)         | 109.11(19) |
| O(13)-Zn(2)-N(8)               | 105.94(18) | O(12)-Zn(2)-N(2)         | 113.82(19) |
| O(12)-Zn(2)-N(8)               | 116.55(19) | N(8)-Zn(2)-N(2)          | 98.01(19)  |

Symmetry code: <sup>i</sup> -x+2, -y, -z+2.

**Table S5.** Selected bond lengths [ $\text{\AA}$ ] and angles [deg] for **4**.

| <b>4</b>                       |            |                          |            |
|--------------------------------|------------|--------------------------|------------|
| Zn(1)-O(11)                    | 1.903(3)   | Zn(1)-O(14) <sup>i</sup> | 1.917(2)   |
| Zn(1)-N(7)                     | 2.015(3)   | Zn(1)-N(9)               | 2.036(3)   |
| Zn(2)-O(11)                    | 1.913(2)   | Zn(2)-O(13)              | 1.939(2)   |
| Zn(2)-N(3)                     | 2.023(3)   | Zn(2)-N(2)               | 2.040(3)   |
| O(11)-Zn(1)-O(14) <sup>i</sup> | 108.24(11) | O(11)-Zn(1)-N(7)         | 107.82(13) |
| O(14) <sup>i</sup> -Zn(1)-N(7) | 119.95(11) | O(11)-Zn(1)-N(9)         | 108.88(12) |
| O(14) <sup>i</sup> -Zn(1)-N(9) | 111.30(11) | N(7)-Zn(1)-N(9)          | 100.09(11) |
| O(11)-Zn(2)-O(13)              | 111.68(11) | O(11)-Zn(2)-N(3)         | 108.83(11) |
| O(13)-Zn(2)-N(3)               | 111.88(11) | O(11)-Zn(2)-N(2)         | 102.39(11) |
| O(13)-Zn(2)-N(2)               | 122.76(10) | N(3)-Zn(2)-N(2)          | 97.85(11)  |

Symmetry code: <sup>i</sup> -x,-y-1,-z+1.**Table S6.** Selected bond lengths [ $\text{\AA}$ ] and angles [deg] for **5**.

| <b>5</b>         |            |                 |            |
|------------------|------------|-----------------|------------|
| Zn(1)-O(9)       | 1.9105(17) | Zn(1)-O(10)     | 1.9358(17) |
| Zn(1)-N(8)       | 2.029(2)   | Zn(1)-N(6)      | 2.038(2)   |
| Zn(2)-O(9)       | 1.9197(18) | Zn(2)-O(11)     | 1.9365(17) |
| Zn(2)-N(4)       | 2.020(2)   | Zn(2)-N(2)      | 2.037(2)   |
| O(9)-Zn(1)-O(10) | 110.82(8)  | O(9)-Zn(1)-N(8) | 109.14(9)  |
| O(10)-Zn(1)-N(8) | 113.72(9)  | O(9)-Zn(1)-N(6) | 104.68(8)  |

|                  |           |                 |           |
|------------------|-----------|-----------------|-----------|
| O(10)-Zn(1)-N(6) | 118.61(9) | N(8)-Zn(1)-N(6) | 98.84(9)  |
| O(9)-Zn(2)-O(11) | 108.72(8) | O(9)-Zn(2)-N(4) | 108.26(9) |
| O(11)-Zn(2)-N(4) | 119.95(8) | O(9)-Zn(2)-N(2) | 107.45(9) |
| O(11)-Zn(2)-N(2) | 113.32(9) | N(4)-Zn(2)-N(2) | 98.23(8)  |

**Table S7.** Selected bond lengths [Å] and angles [deg] for **6**.

| <b>6</b>                       |            |                          |            |
|--------------------------------|------------|--------------------------|------------|
| Zn(1)-O(9)                     | 1.910(2)   | Zn(1)-O(12) <sup>i</sup> | 1.9572(18) |
| Zn(1)-N(4)                     | 2.016(2)   | Zn(1)-N(6)               | 2.028(2)   |
| Zn(2)-O(9)                     | 1.915(2)   | Zn(2)-O(10)              | 1.9268(19) |
| Zn(2)-N(2)                     | 2.008(2)   | Zn(2)-N(8)               | 2.025(2)   |
| O(9)-Zn(1)-O(12) <sup>i</sup>  | 105.63(9)  | O(9)-Zn(1)-N(4)          | 109.04(10) |
| O(12) <sup>i</sup> -Zn(1)-N(4) | 124.43(9)  | O(9)-Zn(1)-N(6)          | 107.54(9)  |
| O(12) <sup>i</sup> -Zn(1)-N(6) | 110.29(9)  | N(4)-Zn(1)-N(6)          | 98.94(10)  |
| O(9)-Zn(2)-O(10)               | 112.48(9)  | O(9)-Zn(2)-N(2)          | 107.50(10) |
| O(10)-Zn(2)-N(2)               | 111.95(9)  | O(9)-Zn(2)-N(8)          | 107.85(10) |
| O(10)-Zn(2)-N(8)               | 115.79(10) | N(2)-Zn(2)-N(8)          | 100.34(11) |

Symmetry code: <sup>i</sup> -x,-y,-z.

**Table S8.** Selected bond lengths [Å] and angles [deg] for **7**.

| <b>7</b>    |          |                          |          |
|-------------|----------|--------------------------|----------|
| Zn(1)-O(13) | 1.906(4) | Zn(1)-O(10) <sup>i</sup> | 1.935(3) |
| Zn(1)-N(2)  | 2.019(4) | Zn(1)-N(4)               | 2.039(4) |

|                                |            |                  |            |
|--------------------------------|------------|------------------|------------|
| Zn(2)-O(13)                    | 1.921(3)   | Zn(2)-O(11)      | 1.926(3)   |
| Zn(2)-N(8)                     | 2.023(4)   | Zn(2)-N(6)       | 2.044(4)   |
| O(13)-Zn(1)-O(10) <sup>i</sup> | 110.59(14) | O(13)-Zn(1)-N(2) | 108.65(16) |
| O(10) <sup>i</sup> -Zn(1)-N(2) | 117.43(15) | O(13)-Zn(1)-N(4) | 106.85(16) |
| O(10) <sup>i</sup> -Zn(1)-N(4) | 114.08(15) | N(2)-Zn(1)-N(4)  | 98.20(16)  |
| O(13)-Zn(2)-O(11)              | 109.27(15) | O(13)-Zn(2)-N(8) | 109.39(15) |
| O(11)-Zn(2)-N(8)               | 113.75(16) | O(13)-Zn(2)-N(6) | 106.65(16) |
| O(11)-Zn(2)-N(6)               | 119.71(14) | N(8)-Zn(2)-N(6)  | 97.23(15)  |

Symmetry code: <sup>i</sup> -x+1,-y-1,-z+2.

**Table S9.** Selected bond lengths [Å] and angles [deg] for **8**.

| <b>8</b>                       |            |                          |            |
|--------------------------------|------------|--------------------------|------------|
| Zn(1)-O(13)                    | 1.914(3)   | Zn(1)-O(11) <sup>i</sup> | 1.936(2)   |
| Zn(1)-N(6)                     | 2.016(4)   | Zn(1)-N(4)               | 2.040(3)   |
| Zn(2)-O(13)                    | 1.910(3)   | Zn(2)-O(9)               | 1.932(3)   |
| Zn(2)-N(8)                     | 2.019(3)   | Zn(2)-N(2)               | 2.044(4)   |
| O(13)-Zn(1)-O(11) <sup>i</sup> | 110.33(12) | O(13)-Zn(1)-N(6)         | 108.54(14) |
| O(11) <sup>i</sup> -Zn(1)-N(6) | 118.06(13) | O(13)-Zn(1)-N(4)         | 107.11(14) |
| O(11) <sup>i</sup> -Zn(1)-N(4) | 113.59(12) | N(6)-Zn(1)-N(4)          | 98.21(14)  |
| O(13)-Zn(2)-O(9)               | 110.04(12) | O(13)-Zn(2)-N(8)         | 109.38(14) |
| O(9)-Zn(2)-N(8)                | 113.96(13) | O(13)-Zn(2)-N(2)         | 106.66(14) |
| O(9)-Zn(2)-N(2)                | 118.91(14) | N(8)-Zn(2)-N(2)          | 96.94(14)  |

Symmetry code: <sup>i</sup> -x,-y+1,-z+1.

**Table S10.** Selected bond lengths [Å] and angles [deg] for **9**.

| <b>9</b>                        |            |                                              |            |
|---------------------------------|------------|----------------------------------------------|------------|
| Zn(1)-O(11)                     | 1.9120(18) | Zn(1)-O(8)                                   | 1.9408(19) |
| Zn(1)-N(4)                      | 2.015(2)   | Zn(1)-N(2)                                   | 2.048(2)   |
| Zn(2)-O(11) <sup>i</sup>        | 1.919(2)   | Zn(2)-O(10)                                  | 1.927(2)   |
| Zn(2)-N(10) <sup>i</sup>        | 2.024(2)   | Zn(2)-N(6) <sup>i</sup>                      | 2.033(2)   |
| O(11)-Zn(1)-O(8)                | 110.81(8)  | O(11)-Zn(1)-N(4)                             | 108.80(9)  |
| O(8)-Zn(1)-N(4)                 | 118.00(9)  | O(11)-Zn(1)-N(2)                             | 106.10(9)  |
| O(8)-Zn(1)-N(2)                 | 113.92(9)  | N(4)-Zn(1)-N(2)                              | 98.02(10)  |
| O(11) <sup>i</sup> -Zn(2)-O(10) | 110.02(8)  | O(11) <sup>i</sup> -Zn(2)-N(10) <sup>i</sup> | 109.12(10) |
| O(10)-Zn(2)-N(10) <sup>i</sup>  | 113.10(10) | O(11) <sup>i</sup> -Zn(2)-N(6) <sup>i</sup>  | 107.31(9)  |
| O(10)-Zn(2)-N(6) <sup>i</sup>   | 119.00(10) | N(10) <sup>i</sup> -Zn(2)-N(6) <sup>i</sup>  | 97.40(9)   |

Symmetry code: <sup>i</sup> -x+1,-y-1,-z+1.**Table S11.** Hydrogen Bonds for Compounds **1-9** (Å and °).

| Compounds | D-H...A                      | d(D-H) | d(H...A) | d(D...A)  | <(DHA) |
|-----------|------------------------------|--------|----------|-----------|--------|
| <b>1</b>  | C48-H48...O7 <sup>ii</sup>   | 0.93   | 2.50     | 3.087(5)  | 121.1  |
|           | C51-H51...O8 <sup>ii</sup>   | 0.93   | 2.53     | 3.228(5)  | 132.0  |
| <b>2</b>  | C45-H45...O6 <sup>ii</sup>   | 0.93   | 2.52     | 3.103(4)  | 120.8  |
|           | C49-H49...O5 <sup>ii</sup>   | 0.93   | 2.63     | 3.287(4)  | 128.0  |
| <b>3</b>  | C43-H43...O8 <sup>ii</sup>   | 0.93   | 2.55     | 3.148(10) | 112.5  |
|           | C48-H48...O7 <sup>ii</sup>   | 0.93   | 2.64     | 3.338(11) | 132.7  |
| <b>4</b>  | C42-H42...O3 <sup>ii</sup>   | 0.93   | 2.39     | 3.112(4)  | 134.8  |
|           | C44-H44...O4 <sup>ii</sup>   | 0.93   | 2.57     | 3.302(4)  | 136.4  |
|           | C28-H28A...O12 <sup>ii</sup> | 0.97   | 2.66     | 3.266(2)  | 120.5  |
| <b>5</b>  | C31-H31...O3 <sup>i</sup>    | 0.93   | 2.44     | 3.074(3)  | 125.4  |

|          |                              |      |      |          |        |
|----------|------------------------------|------|------|----------|--------|
|          | C33-H33···O4 <sup>i</sup>    | 0.93 | 2.69 | 3.372(2) | 130.5  |
|          | C70-H70A···O12 <sup>i</sup>  | 0.97 | 2.70 | 3.367(2) | 126.4  |
| <b>6</b> | C37-H37···N9 <sup>ii</sup>   | 0.93 | 2.54 | 3.328(4) | 143.1  |
|          | C52-H52···O2 <sup>ii</sup>   | 0.93 | 2.68 | 3.346(2) | 129.01 |
|          | C48-H48···N6 <sup>iii</sup>  | 0.93 | 2.50 | 3.274(5) | 140.7  |
| <b>7</b> | C90-H90···O5 <sup>ii</sup>   | 0.93 | 2.45 | 3.093(6) | 126.7  |
|          | C92-H92···O6 <sup>ii</sup>   | 0.93 | 2.48 | 3.202(6) | 134.4  |
|          | C31-H31A···O9 <sup>ii</sup>  | 0.97 | 2.67 | 3.328(1) | 125.6  |
| <b>8</b> | C52-H52···O4 <sup>ii</sup>   | 0.93 | 2.48 | 3.181(5) | 132.6  |
|          | C39-H39···O3 <sup>ii</sup>   | 0.93 | 2.46 | 3.079(5) | 124.3  |
|          | C28-H28A···O10 <sup>ii</sup> | 0.97 | 2.72 | 3.390(1) | 126.4  |
| <b>9</b> | C30-H30B···O9 <sup>ii</sup>  | 0.97 | 2.65 | 3.323(3) | 126.5  |
|          | C42-H42···O5 <sup>iii</sup>  | 0.93 | 2.46 | 3.094(4) | 125.8  |
|          | C85-H85···O6 <sup>iii</sup>  | 0.93 | 2.55 | 3.251(4) | 132.8  |

Symmetry code for **1**: <sup>ii</sup> -1+x, y, z; symmetry code for **2**: <sup>ii</sup> -x+1, -y, -z+2; symmetry code for **3**: <sup>ii</sup> -x+1, -y+1, -z+1; symmetry code for **4**: <sup>ii</sup> x-1, y, z; symmetry code for **5**: <sup>i</sup> x+1, y, z; symmetry code for **6**: <sup>ii</sup> x+1, y, z; <sup>iii</sup> -x+1/2, y+1/2, -z+1/2. symmetry code for **7**: <sup>ii</sup> x+1, y, z; symmetry code for **8**: <sup>ii</sup> -1+x, y, z; symmetry code for **9**: <sup>ii</sup> -x, -y-1, -z+1; <sup>iii</sup> x+1, y, z.

## References

- (1) Wang, F.-F.; Liu, Y.-Y.; Pei, W.-Y.; Ma, J.-F. Three Resorcin[4]arene-Based 2D Zn(II) Supramolecular Isomers Synthesized via Structure-Directing Strategy for Knoevenagel Condensation. *Inorg. Chem.*, **2021**, *60*, 7329–7336.
- (2) Sheldrick, G. M. SHELXS-2018, Programs for X-ray Crystal Structure Solution; University of Göttingen: Göttingen, Germany, **2018**.
- (3) Farrugia, L. J. WINGX: A Windows Program for Crystal Structure Analysis; University of Glasgow: Glasgow, UK, **1988**.
- (4) Sheldrick, G. M. SHELXTL-2018, Programs for X-ray Crystal Structure Refinement; University



of Göttingen: Göttingen, Germany, **2018**.

(5) Spek, A. L. PLATON SQUEEZE: A Tool for the Calculation of the Disordered Solvent Contribution to the Calculated Structure Factors. *Acta Crystallogr. Sect. C: Struct. Chem.*, **2015**, *71*, 9–18.

(6) Dong, S. H.; Liu, Z.; Liu, R. H.; Chen, L. M.; Chen, J. Z.; Xu, Y. S. Visible-Light-Induced Catalytic Transfer Hydrogenation of Aromatic Aldehydes by Palladium Immobilized on Amine-Functionalized Iron-Based Metal–Organic Frameworks. *ACS Appl. Nano Mater.*, **2018**, *1*, 4247–4257.
